# Supplementary material for: MiR-202 controls female fecundity by regulating medaka oogenesis
Source: PubMed Central journal article supplement (PMC6147661; doi:10.1371/journal.pgen.1007593), 2018-09-10
Supplement: pgen.1007593.s004.pdf [file pgen.1007593.s004.pdf]

# Notes : Created from Advanced Analysis operation: significance Analysis.

#Entitylist : Fold change >= 2.0

#Interpretation : Treatment (Non-averaged)

#Experiment: New Experiment

#corrected p-value cut-off:0.05

#Selected Test : T Test unpaired

#p-value computation: Asymptotic

#Multiple Testing Correction: Benjamini-Hochberg

#

# Technology : Agilent.SingleColor.82421

# Owner : gxuser

# Created On : Fri Jun 02 16:04:15 CEST 2017

| ProbeName  | p (Corr)    | p          | Regulation | FC (abs)  | FC         |
|------------|-------------|------------|------------|-----------|------------|
| CUST_45763 | 0,028172938 | 4,43E-04   | down       | 2,075612  | -2,075612  |
| CUST_25210 | 0,04061277  | 8,81E-04   | down       | 2,1106827 | -2,1106827 |
| CUST_45868 | 0,005240591 | 1,03E-05   | down       | 2,1391544 | -2,1391544 |
| CUST_35721 | 0,04369359  | 0,00134713 | down       | 2,439573  | -2,439573  |
| CUST_6619  | 0,045512788 | 0,00160936 | down       | 2,5172336 | -2,5172336 |
| CUST_703_P | 0,041526437 | 9,92E-04   | down       | 2,548635  | -2,548635  |
| CUST_49074 | 0,045512788 | 0,00163998 | down       | 3,103564  | -3,103564  |
| CUST_45596 | 0,017608102 | 1,06E-04   | down       | 3,1225083 | -3,1225083 |
| CUST_4543  | 0,03969736  | 8,31E-04   | down       | 3,4979045 | -3,4979045 |
| CUST_963_P | 7,91E-04    | 5,92E-07   | up         | 7,241655  | 7,241655   |
| CUST_41342 | 0,014321216 | 7,50E-05   | up         | 6,0782    | 6,0782     |
| CUST_30125 | 0,033430077 | 5,75E-04   | up         | 3,5423074 | 3,5423074  |
| CUST_23568 | 0,04369359  | 0,0013083  | up         | 3,4702334 | 3,4702334  |
| CUST_26528 | 0,04369359  | 0,00138775 | up         | 3,114726  | 3,114726   |
| CUST_19118 | 0,024941828 | 2,98E-04   | up         | 3,0257053 | 3,0257053  |
| CUST_42895 | 0,045512788 | 0,00149873 | up         | 2,8776276 | 2,8776276  |
| CUST_28351 | 0,04319733  | 0,00113082 | up         | 2,5836635 | 2,5836635  |
| CUST_39133 | 0,04319733  | 0,0010741  | up         | 2,5670524 | 2,5670524  |
| CUST_1200  | 0,025215108 | 3,48E-04   | up         | 2,527852  | 2,527852   |
| CUST_39836 | 0,018476227 | 1,38E-04   | up         | 2,5138113 | 2,5138113  |
| CUST_25427 | 0,04882434  | 0,00189893 | up         | 2,499248  | 2,499248   |
| CUST_47226 | 0,04369359  | 0,00120936 | up         | 2,4254782 | 2,4254782  |
| CUST_30061 | 0,019330831 | 1,74E-04   | up         | 2,4111335 | 2,4111335  |
| CUST_17251 | 0,017608102 | 1,19E-04   | up         | 2,3526726 | 2,3526726  |
| CUST_34735 | 0,04863276  | 0,0018551  | up         | 2,323327  | 2,323327   |
| CUST_13295 | 0,03969736  | 8,05E-04   | up         | 2,3219929 | 2,3219929  |
| CUST_45850 | 0,045512788 | 0,00156972 | up         | 2,2977266 | 2,2977266  |
| CUST_17501 | 0,025215108 | 3,77E-04   | up         | 2,2634015 | 2,2634015  |
| CUST_22466 | 0,04369359  | 0,00128716 | up         | 2,2490396 | 2,2490396  |
| CUST_42391 | 0,006175743 | 2,05E-05   | up         | 2,2363784 | 2,2363784  |
| CUST_25528 | 0,04369359  | 0,00131231 | up         | 2,1965227 | 2,1965227  |
| CUST_4996  | 0,019330831 | 1,72E-04   | up         | 2,1837022 | 2,1837022  |
| CUST_6829  | 0,022902153 | 2,40E-04   | up         | 2,1411421 | 2,1411421  |

|            |             |            |    |           |           |
|------------|-------------|------------|----|-----------|-----------|
| CUST_40504 | 0,03559494  | 6,39E-04   | up | 2,1275694 | 2,1275694 |
| CUST_142_P | 0,04369359  | 0,00140525 | up | 2,1077418 | 2,1077418 |
| CUST_38687 | 0,0414471   | 9,30E-04   | up | 2,099244  | 2,099244  |
| CUST_15119 | 0,04319733  | 0,00111421 | up | 2,0905802 | 2,0905802 |
| CUST_11749 | 0,03714719  | 6,95E-04   | up | 2,0854282 | 2,0854282 |
| CUST_2258  | 0,025215108 | 3,21E-04   | up | 2,0842583 | 2,0842583 |
| CUST_37841 | 0,025215108 | 3,71E-04   | up | 2,074868  | 2,074868  |
| CUST_30025 | 0,045512788 | 0,0016688  | up | 2,0195472 | 2,0195472 |
| CUST_31271 | 0,012130885 | 5,44E-05   | up | 2,0030596 | 2,0030596 |

| Log FC     | WT<br>1++.txt:gProc | WT<br>7++.txt:gProc | WT<br>8++.txt:gProc | WT<br>12++.txt:gProc | miR-202 KO<br>4--.txt:gProc | miR-202 KO<br>5--.txt:gProc |
|------------|---------------------|---------------------|---------------------|----------------------|-----------------------------|-----------------------------|
| -1,0535368 | 13                  | 20                  | 13                  | 13                   | 32                          | 32                          |
| -1,0777097 | 114                 | 187                 | 125                 | 174                  | 205                         | 345                         |
| -1,0970407 | 99                  | 123                 | 90                  | 126                  | 197                         | 230                         |
| -1,2866287 | 608                 | 690                 | 956                 | 576                  | 1174                        | 1759                        |
| -1,3318391 | 57                  | 84                  | 119                 | 71                   | 213                         | 206                         |
| -1,3497248 | 274                 | 594                 | 367                 | 441                  | 1124                        | 1050                        |
| -1,6339259 | 12                  | 23                  | 16                  | 22                   | 82                          | 41                          |
| -1,6427053 | 37                  | 51                  | 49                  | 43                   | 151                         | 162                         |
| -1,8064909 | 70                  | 120                 | 92                  | 119                  | 214                         | 264                         |
| 2,8563194  | 2771                | 3494                | 3486                | 3501                 | 445                         | 412                         |
| 2,6036441  | 45                  | 69                  | 55                  | 88                   | 6                           | 13                          |
| 1,8246894  | 40                  | 30                  | 53                  | 32                   | 11                          | 10                          |
| 1,7950327  | 28                  | 35                  | 30                  | 49                   | 16                          | 8                           |
| 1,6391053  | 23                  | 25                  | 20                  | 33                   | 5                           | 8                           |
| 1,5972714  | 20                  | 31                  | 34                  | 25                   | 7                           | 10                          |
| 1,5248799  | 23                  | 23                  | 14                  | 27                   | 6                           | 11                          |
| 1,3694181  | 92                  | 100                 | 92                  | 151                  | 27                          | 45                          |
| 1,3601127  | 88                  | 182                 | 132                 | 165                  | 40                          | 42                          |
| 1,337912   | 71                  | 114                 | 72                  | 69                   | 28                          | 34                          |
| 1,3298764  | 171                 | 185                 | 176                 | 248                  | 79                          | 81                          |
| 1,3214941  | 35                  | 33                  | 28                  | 63                   | 12                          | 16                          |
| 1,2782692  | 30                  | 30                  | 26                  | 38                   | 14                          | 14                          |
| 1,2697115  | 80                  | 78                  | 61                  | 90                   | 28                          | 33                          |
| 1,2343005  | 84                  | 105                 | 90                  | 137                  | 43                          | 38                          |
| 1,2161922  | 53                  | 56                  | 61                  | 56                   | 24                          | 28                          |
| 1,2153635  | 157                 | 169                 | 160                 | 159                  | 84                          | 49                          |
| 1,2002071  | 191                 | 186                 | 190                 | 316                  | 100                         | 94                          |
| 1,1784925  | 225                 | 219                 | 146                 | 248                  | 75                          | 93                          |
| 1,1693091  | 76                  | 121                 | 101                 | 147                  | 37                          | 56                          |
| 1,1611643  | 522                 | 538                 | 589                 | 606                  | 242                         | 253                         |
| 1,1352214  | 32                  | 43                  | 34                  | 55                   | 13                          | 23                          |
| 1,1267761  | 33                  | 32                  | 25                  | 36                   | 11                          | 16                          |
| 1,0983806  | 69                  | 91                  | 95                  | 89                   | 30                          | 42                          |

|           |     |     |     |     |     |     |
|-----------|-----|-----|-----|-----|-----|-----|
| 1,0892062 | 294 | 322 | 311 | 387 | 185 | 136 |
| 1,0756981 | 22  | 35  | 28  | 41  | 12  | 18  |
| 1,0698699 | 108 | 143 | 105 | 176 | 49  | 54  |
| 1,0639035 | 28  | 42  | 33  | 51  | 18  | 21  |
| 1,0603436 | 129 | 200 | 148 | 209 | 78  | 88  |
| 1,0595341 | 216 | 319 | 250 | 254 | 98  | 132 |
| 1,0530195 | 154 | 191 | 172 | 216 | 77  | 106 |
| 1,0140319 | 88  | 106 | 98  | 158 | 51  | 63  |
| 1,0022054 | 199 | 237 | 235 | 224 | 107 | 119 |

miR-202 KO miR-202 KO

17--.txt:gProi 20--.txt:gProi 1++.txt:gProc 7++.txt:gProc 8++.txt:gProc 12++.txt:gProc 4--.txt:gProce

|      |      |    |    |    |    |    |
|------|------|----|----|----|----|----|
| 20   | 31   | 4  | 4  | 4  | 4  | 5  |
| 284  | 346  | 7  | 7  | 7  | 7  | 8  |
| 206  | 234  | 7  | 7  | 7  | 7  | 8  |
| 1451 | 2058 | 9  | 9  | 10 | 9  | 10 |
| 148  | 187  | 6  | 6  | 7  | 6  | 8  |
| 623  | 1137 | 8  | 9  | 9  | 9  | 10 |
| 36   | 60   | 4  | 4  | 4  | 4  | 6  |
| 86   | 134  | 5  | 5  | 6  | 5  | 7  |
| 323  | 565  | 6  | 7  | 7  | 7  | 8  |
| 445  | 397  | 12 | 12 | 12 | 12 | 9  |
| 10   | 11   | 6  | 6  | 6  | 6  | 3  |
| 7    | 12   | 5  | 5  | 6  | 5  | 4  |
| 6    | 9    | 5  | 5  | 5  | 6  | 4  |
| 6    | 13   | 5  | 4  | 4  | 5  | 2  |
| 9    | 8    | 4  | 5  | 5  | 5  | 3  |
| 6    | 6    | 5  | 4  | 4  | 5  | 3  |
| 44   | 40   | 7  | 6  | 7  | 7  | 5  |
| 51   | 70   | 7  | 7  | 7  | 7  | 5  |
| 20   | 38   | 6  | 7  | 6  | 6  | 5  |
| 62   | 66   | 8  | 7  | 7  | 8  | 6  |
| 12   | 16   | 5  | 5  | 5  | 6  | 4  |
| 7    | 13   | 5  | 5  | 5  | 5  | 4  |
| 30   | 27   | 6  | 6  | 6  | 6  | 5  |
| 36   | 45   | 6  | 6  | 7  | 7  | 6  |
| 13   | 30   | 6  | 6  | 6  | 6  | 5  |
| 58   | 73   | 7  | 7  | 7  | 7  | 7  |
| 78   | 79   | 8  | 7  | 8  | 8  | 7  |
| 75   | 98   | 8  | 8  | 7  | 8  | 6  |
| 47   | 41   | 6  | 7  | 7  | 7  | 5  |
| 195  | 254  | 9  | 9  | 9  | 9  | 8  |
| 16   | 18   | 5  | 5  | 5  | 6  | 4  |
| 12   | 16   | 5  | 5  | 5  | 5  | 4  |
| 40   | 39   | 6  | 6  | 7  | 6  | 5  |

|     |     |   |   |   |   |   |
|-----|-----|---|---|---|---|---|
| 117 | 142 | 8 | 8 | 8 | 8 | 8 |
| 10  | 15  | 5 | 5 | 5 | 5 | 4 |
| 64  | 65  | 7 | 7 | 7 | 7 | 6 |
| 13  | 16  | 5 | 5 | 5 | 6 | 4 |
| 51  | 91  | 7 | 7 | 7 | 8 | 6 |
| 84  | 160 | 8 | 8 | 8 | 8 | 7 |
| 57  | 96  | 7 | 7 | 7 | 8 | 6 |
| 40  | 51  | 7 | 6 | 7 | 7 | 6 |
| 94  | 98  | 8 | 8 | 8 | 8 | 7 |

5--.txt:gProci 17--.txt:gProi 20--.txt:gProi Description

|    |    |                                                                                                          |
|----|----|----------------------------------------------------------------------------------------------------------|
| 5  | 5  | 5                                                                                                        |
| 8  | 8  | 8 zgc:123321 [Source:ZFIN;Acc:ZDB-GENE-051023-1]                                                         |
| 8  | 8  | 8                                                                                                        |
| 11 | 11 | 11 SLIT-ROBO Rho GTPase activating protein 3 [Source:ZFIN;Acc:ZDB-GENE-050208-762]                       |
| 8  | 7  | 7 si:dkey-49n23.1 [Source:ZFIN;Acc:ZDB-GENE-050208-762]                                                  |
| 10 | 10 | 10                                                                                                       |
| 5  | 5  | 6 natriuretic peptide receptor 1b [Source:ZFIN;Acc:ZDB-GENE-050208-762]                                  |
| 7  | 7  | 7 basonuclin 1 [Source:HGNC Symbol;Acc:HGNC:1081]                                                        |
| 8  | 9  | 9 Oryzias latipes myosin heavy chain (mmyhemb1), mRNA. [Source:ZFIN;Acc:ZDB-GENE-050208-762]             |
| 9  | 9  | 9 SET domain containing 4 [Source:ZFIN;Acc:ZDB-GENE-050208-762]                                          |
| 4  | 4  | 3 kelch-like family member 23 [Source:ZFIN;Acc:ZDB-GENE-050208-762]                                      |
| 3  | 3  | 3 zinc finger C3H1-type containing [Source:HGNC Symbol;Acc:HGNC:1081]                                    |
| 3  | 3  | 3                                                                                                        |
| 3  | 3  | 4                                                                                                        |
| 3  | 3  | 3 wingless-type MMTV integration site family, member 2Bb [Source:ZFIN;Acc:ZDB-GENE-050208-762]           |
| 3  | 3  | 3 small integral membrane protein 8 [Source:ZFIN;Acc:ZDB-GENE-050208-762]                                |
| 5  | 6  | 5 Oryzias latipes wingless-type MMTV integration site family [Source:ZFIN;Acc:ZDB-GENE-050208-762]       |
| 5  | 6  | 6 si:dkey-194e6.1 [Source:ZFIN;Acc:ZDB-GENE-100922-43]                                                   |
| 5  | 5  | 5 inositol polyphosphate-5-phosphatase A [Source:HGNC Symbol;Acc:HGNC:1081]                              |
| 6  | 6  | 6                                                                                                        |
| 4  | 4  | 4 hydroxysteroid (17-beta) dehydrogenase 7 [Source:ZFIN;Acc:ZDB-GENE-080204-110]                         |
| 4  | 3  | 4 zgc:172271 [Source:ZFIN;Acc:ZDB-GENE-080204-110]                                                       |
| 5  | 5  | 5 solute carrier family 23 (ascorbic acid transporter), member 1 [Source:ZFIN;Acc:ZDB-GENE-080204-110]   |
| 5  | 5  | 5 heparan sulfate (glucosamine) 3-O-sulfotransferase 3B1a [Source:ZFIN;Acc:ZDB-GENE-080204-110]          |
| 5  | 4  | 5 inositol 1,4,5-trisphosphate receptor, type 1a [Source:ZFIN;Acc:ZDB-GENE-080204-110]                   |
| 6  | 6  | 6 si:dkeyp-69c1.7 [Source:ZFIN;Acc:ZDB-GENE-091204-69]                                                   |
| 7  | 7  | 6 Oryzias latipes cytochrome P-450 17alpha-hydroxylase/C17 [Source:ZFIN;Acc:ZDB-GENE-091204-69]          |
| 7  | 6  | 7 myosin, light chain 6, alkali, smooth muscle and non-muscle [Source:ZFIN;Acc:ZDB-GENE-091204-69]       |
| 6  | 6  | 5 UDP-Gal:betaGlcNAc beta 1,4- galactosyltransferase, polypeptide 1 [Source:ZFIN;Acc:ZDB-GENE-091204-69] |
| 8  | 8  | 8 ADAM metallopeptidase domain 23a [Source:ZFIN;Acc:ZDB-GENE-060503-554]                                 |
| 4  | 4  | 4 discoidin domain receptor tyrosine kinase 2b [Source:ZFIN;Acc:ZDB-GENE-060503-554]                     |
| 4  | 4  | 4 inhibin, alpha [Source:ZFIN;Acc:ZDB-GENE-060503-554]                                                   |
| 5  | 6  | 5 tumor necrosis factor, alpha-induced protein 8-like 3 [Source:ZFIN;Acc:ZDB-GENE-060503-554]            |

|   |   |                                                                       |
|---|---|-----------------------------------------------------------------------|
| 7 | 7 | 7 fibroblast activation protein, alpha [Source:ZFIN;Acc:ZDB-G         |
| 4 | 4 | 4                                                                     |
| 6 | 6 | 6                                                                     |
| 4 | 4 | 4                                                                     |
| 6 | 6 | 6 solute carrier family 43 (amino acid system L transporter), i       |
| 7 | 7 | 7                                                                     |
| 7 | 6 | 6 myelin protein zero like 2 [Source:HGNC Symbol;Acc:HGNC             |
| 6 | 6 | 6 <i>Oryzias latipes</i> steroidogenic acute regulatory protein (star |
| 7 | 7 | 7 solute carrier family 20, member 1a [Source:ZFIN;Acc:ZDB-           |



| Fold-change | Gene ID            | Gene Symbol         | Transcript ID        |
|-------------|--------------------|---------------------|----------------------|
| 2,1         | ENSORLG00000019183 |                     | ENSORLT00000023904.1 |
| 2,1         | ENSORLG00000010730 | zgc:123321          | ENSORLT00000013454.1 |
| 2,1         | ENSORLG00000019238 |                     | ENSORLT00000023970.1 |
| 2,4         | ENSORLG00000000702 | srgap3              | ENSORLT00000000866.2 |
| 2,5         | ENSORLG00000002866 | si:dkey-49n23.1     | ENSORLT00000003586.1 |
| 2,5         | ENSORLG00000000326 |                     | ENSORLT00000000396.1 |
| 3,1         | ENSORLG00000020832 | npr1b               | ENSORLT00000025799.1 |
| 3,1         | ENSORLG00000019081 | BNC1                | ENSORLT00000023795.1 |
| 3,5         | ENSORLG00000001985 | mmyhemb1            | ENSORLT00000002483.1 |
| 7,2         | ENSORLG00000000434 | setd4               | ENSORLT00000000535.1 |
| 6,1         | ENSORLG00000017198 | klhl23              | ENSORLT00000021517.1 |
| 3,5         | ENSORLG00000000155 | ZFC3H1              | ENSORLT00000000193.3 |
| 3,5         | ENSORLG00000010020 |                     | ENSORLT00000012572.1 |
| 3,1         | ENSORLG00000011290 |                     | ENSORLT00000014146.1 |
| 3,0         | ENSORLG00000008125 | wnt2bb              | ENSORLT00000010199.1 |
| 2,9         | ENSORLG00000017811 | smim8               | ENSORLT00000022290.1 |
| 2,6         | ENSORLG00000012025 | wnt4                | ENSORLT00000015061.1 |
| 2,6         | ENSORLG00000016335 | si:dkey-194e6.1     | ENSORLT00000020453.1 |
| 2,5         | ENSORLG00000000540 | INPP5A              | ENSORLT00000000666.1 |
| 2,5         | ENSORLG00000016620 |                     | ENSORLT00000020802.1 |
| 2,5         | ENSORLG00000010814 | hsd17b7 (1 of many) | ENSORLT00000013564.1 |
| 2,4         | ENSORLG00000019946 | zgc:172271          | ENSORLT00000024771.1 |
| 2,4         | ENSORLG00000012701 | slc23a1             | ENSORLT00000015919.1 |
| 2,4         | ENSORLG00000007353 | hs3st3b1a           | ENSORLT00000009221.1 |
| 2,3         | ENSORLG00000014557 | itpr1a              | ENSORLT00000018259.1 |
| 2,3         | ENSORLG00000005686 | si:dkeyp-69c1.7     | ENSORLT00000007149.1 |
| 2,3         | ENSORLG00000019226 | cyp17               | ENSORLT00000023960.1 |
| 2,3         | ENSORLG00000007460 | myl6                | ENSORLT00000009354.1 |
| 2,2         | ENSORLG00000009547 | b4galt5             | ENSORLT00000011972.1 |
| 2,2         | ENSORLG00000017616 | adam23a             | ENSORLT00000022043.1 |
| 2,2         | ENSORLG00000010857 | ddr2b               | ENSORLT00000013618.1 |
| 2,2         | ENSORLG00000002184 | inha                | ENSORLT00000002714.1 |
| 2,1         | ENSORLG00000002956 | tnfaip8l3           | ENSORLT00000003692.1 |

|     |                    |                   |                      |
|-----|--------------------|-------------------|----------------------|
| 2,1 | ENSORLG00000016880 | fap               | ENSORLT00000021121.1 |
| 2,1 | ENSORLG00000000067 |                   | ENSORLT00000000080.1 |
| 2,1 | ENSORLG00000016176 |                   | ENSORLT00000020238.1 |
| 2,1 | ENSORLG00000006452 |                   | ENSORLT00000008100.1 |
| 2,1 | ENSORLG00000005019 | slc43a2b          | ENSORLT00000006327.1 |
| 2,1 | ENSORLG00000001022 |                   | ENSORLT00000001258.1 |
| 2,1 | ENSORLG00000015826 | MPZL2 (1 of many) | ENSORLT00000019822.1 |
| 2,0 | ENSORLG00000012688 | star              | ENSORLT00000015903.1 |
| 2,0 | ENSORLG00000013173 | slc20a1a          | ENSORLT00000016515.1 |
