# Supplementary material for: MiR-202 controls female fecundity by regulating medaka oogenesis
Source: PubMed Central journal article supplement (PMC6147661; doi:10.1371/journal.pgen.1007593), 2018-09-10
Supplement: pgen.1007593.s005.pdf [file pgen.1007593.s005.pdf]

| ARNm        | miRanda | TargetScan | Gene               |
|-------------|---------|------------|--------------------|
| ENSORLT0000 | 5UTR    | UTR5       | ENSORLG00000006109 |
| ENSORLT0000 | 5UTR    | UTR5       | ENSORLG00000013749 |
| ENSORLT0000 | 5UTR    | UTR5       | ENSORLG00000018359 |
| ENSORLT0000 | 5UTR    | UTR5       | ENSORLG00000015923 |
| ENSORLT0000 | 5UTR    | UTR5       | ENSORLG00000010897 |
| ENSORLT0000 | 5UTR    | UTR5       | ENSORLG00000009609 |
| ENSORLT0000 | 5UTR    | UTR5       | ENSORLG00000009798 |
| ENSORLT0000 | 5UTR    | UTR5       | ENSORLG00000002648 |
| ENSORLT0000 | 5UTR    | UTR5       | ENSORLG00000003605 |
| ENSORLT0000 | 5UTR    | UTR5       | ENSORLG00000015980 |
| ENSORLT0000 | 5UTR    | UTR5       | ENSORLG00000015246 |
| ENSORLT0000 | 5UTR    | UTR5       | ENSORLG00000015246 |
| ENSORLT0000 | 5UTR    | UTR5       | ENSORLG00000006559 |
| ENSORLT0000 | 5UTR    | UTR5       | ENSORLG00000015878 |
| ENSORLT0000 | 5UTR    | UTR5       | ENSORLG00000004305 |
| ENSORLT0000 | 3UTR    | UTR3       | ENSORLG00000000991 |
| ENSORLT0000 | 3UTR    | UTR3       | ENSORLG00000010803 |
| ENSORLT0000 | 3UTR    | UTR3       | ENSORLG00000003787 |
| ENSORLT0000 | 3UTR    | UTR3       | ENSORLG00000019070 |
| ENSORLT0000 | 3UTR    | UTR3       | ENSORLG00000004061 |
| ENSORLT0000 | 3UTR    | UTR3       | ENSORLG00000020425 |
| ENSORLT0000 | 3UTR    | UTR3       | ENSORLG00000018349 |
| ENSORLT0000 | 3UTR    | UTR3       | ENSORLG00000014188 |
| ENSORLT0000 | 3UTR    | UTR3       | ENSORLG00000011661 |
| ENSORLT0000 | 3UTR    | UTR3       | ENSORLG00000002452 |
| ENSORLT0000 | 3UTR    | UTR3       | ENSORLG00000014598 |
| ENSORLT0000 | 3UTR    | UTR3       | ENSORLG00000013621 |
| ENSORLT0000 | 3UTR    | UTR3       | ENSORLG00000004495 |
| ENSORLT0000 | 3UTR    | UTR3       | ENSORLG00000019685 |
| ENSORLT0000 | 3UTR    | UTR3       | ENSORLG00000017948 |
| ENSORLT0000 | 3UTR    | UTR3       | ENSORLG00000013973 |
| ENSORLT0000 | 3UTR    | UTR3       | ENSORLG00000016249 |
| ENSORLT0000 | 3UTR    | UTR3       | ENSORLG00000020656 |
| ENSORLT0000 | CDS     | CDS        | ENSORLG00000002627 |
| ENSORLT0000 | CDS     | CDS        | ENSORLG00000006241 |
| ENSORLT0000 | CDS     | CDS        | ENSORLG00000008019 |
| ENSORLT0000 | CDS     | CDS        | ENSORLG00000014801 |
| ENSORLT0000 | CDS     | CDS        | ENSORLG00000006928 |
| ENSORLT0000 | CDS     | CDS        | ENSORLG00000007874 |
| ENSORLT0000 | CDS     | CDS        | ENSORLG00000014056 |
| ENSORLT0000 | CDS     | CDS        | ENSORLG00000005151 |
| ENSORLT0000 | CDS     | CDS        | ENSORLG00000010050 |
| ENSORLT0000 | CDS     | CDS        | ENSORLG00000015608 |
| ENSORLT0000 | CDS     | CDS        | ENSORLG00000005341 |
| ENSORLT0000 | CDS     | CDS        | ENSORLG00000000259 |
| ENSORLT0000 | CDS     | CDS        | ENSORLG00000004730 |
| ENSORLT0000 | CDS     | CDS        | ENSORLG00000014323 |
| ENSORLT0000 | CDS     | CDS        | ENSORLG00000000526 |
| ENSORLT0000 | CDS     | CDS        | ENSORLG00000003898 |
| ENSORLT0000 | CDS     | CDS        | ENSORLG00000011395 |
| ENSORLT0000 | CDS     | CDS        | ENSORLG00000014142 |

|                 |     |                    |
|-----------------|-----|--------------------|
| ENSORLT0000 CDS | CDS | ENSORLG00000015669 |
| ENSORLT0000 CDS | CDS | ENSORLG00000016882 |
| ENSORLT0000 CDS | CDS | ENSORLG00000009280 |
| ENSORLT0000 CDS | CDS | ENSORLG00000004843 |
| ENSORLT0000 CDS | CDS | ENSORLG00000014910 |
| ENSORLT0000 CDS | CDS | ENSORLG00000008476 |
| ENSORLT0000 CDS | CDS | ENSORLG00000014338 |
| ENSORLT0000 CDS | CDS | ENSORLG00000003334 |
| ENSORLT0000 CDS | CDS | ENSORLG00000012680 |
| ENSORLT0000 CDS | CDS | ENSORLG00000005956 |
| ENSORLT0000 CDS | CDS | ENSORLG00000017690 |
| ENSORLT0000 CDS | CDS | ENSORLG00000015634 |
| ENSORLT0000 CDS | CDS | ENSORLG00000004833 |
| ENSORLT0000 CDS | CDS | ENSORLG00000016108 |
| ENSORLT0000 CDS | CDS | ENSORLG00000011497 |
| ENSORLT0000 CDS | CDS | ENSORLG00000005779 |
| ENSORLT0000 CDS | CDS | ENSORLG00000019403 |
| ENSORLT0000 CDS | CDS | ENSORLG00000019403 |
| ENSORLT0000 CDS | CDS | ENSORLG00000006881 |
| ENSORLT0000 CDS | CDS | ENSORLG00000011737 |
| ENSORLT0000 CDS | CDS | ENSORLG00000003272 |
| ENSORLT0000 CDS | CDS | ENSORLG00000017319 |
| ENSORLT0000 CDS | CDS | ENSORLG00000003182 |
| ENSORLT0000 CDS | CDS | ENSORLG00000002130 |
| ENSORLT0000 CDS | CDS | ENSORLG00000010741 |
| ENSORLT0000 CDS | CDS | ENSORLG00000007525 |
| ENSORLT0000 CDS | CDS | ENSORLG00000010171 |
| ENSORLT0000 CDS | CDS | ENSORLG00000008026 |
| ENSORLT0000 CDS | CDS | ENSORLG00000009005 |
| ENSORLT0000 CDS | CDS | ENSORLG00000002336 |
| ENSORLT0000 CDS | CDS | ENSORLG00000014368 |
| ENSORLT0000 CDS | CDS | ENSORLG00000005217 |
| ENSORLT0000 CDS | CDS | ENSORLG00000000676 |
| ENSORLT0000 CDS | CDS | ENSORLG00000014324 |
| ENSORLT0000 CDS | CDS | ENSORLG00000020389 |
| ENSORLT0000 CDS | CDS | ENSORLG00000016842 |
| ENSORLT0000 CDS | CDS | ENSORLG00000008417 |
| ENSORLT0000 CDS | CDS | ENSORLG00000016381 |
| ENSORLT0000 CDS | CDS | ENSORLG00000014520 |
| ENSORLT0000 CDS | CDS | ENSORLG00000006870 |
| ENSORLT0000 CDS | CDS | ENSORLG00000001045 |
| ENSORLT0000 CDS | CDS | ENSORLG00000002132 |
| ENSORLT0000 CDS | CDS | ENSORLG00000004556 |
| ENSORLT0000 CDS | CDS | ENSORLG00000007776 |
| ENSORLT0000 CDS | CDS | ENSORLG00000009222 |
| ENSORLT0000 CDS | CDS | ENSORLG00000016736 |
| ENSORLT0000 CDS | CDS | ENSORLG00000007244 |
| ENSORLT0000 CDS | CDS | ENSORLG00000011554 |
| ENSORLT0000 CDS | CDS | ENSORLG00000011500 |
| ENSORLT0000 CDS | CDS | ENSORLG00000002443 |
| ENSORLT0000 CDS | CDS | ENSORLG00000011353 |
| ENSORLT0000 CDS | CDS | ENSORLG00000013827 |

|                 |     |                    |
|-----------------|-----|--------------------|
| ENSORLT0000 CDS | CDS | ENSORLG00000017116 |
| ENSORLT0000 CDS | CDS | ENSORLG00000008279 |
| ENSORLT0000 CDS | CDS | ENSORLG00000001843 |
| ENSORLT0000 CDS | CDS | ENSORLG00000004636 |
| ENSORLT0000 CDS | CDS | ENSORLG00000002809 |
| ENSORLT0000 CDS | CDS | ENSORLG00000016946 |
| ENSORLT0000 CDS | CDS | ENSORLG00000017184 |
| ENSORLT0000 CDS | CDS | ENSORLG00000008773 |
| ENSORLT0000 CDS | CDS | ENSORLG00000003164 |
| ENSORLT0000 CDS | CDS | ENSORLG00000006341 |
| ENSORLT0000 CDS | CDS | ENSORLG00000011579 |
| ENSORLT0000 CDS | CDS | ENSORLG00000013616 |
| ENSORLT0000 CDS | CDS | ENSORLG00000015459 |
| ENSORLT0000 CDS | CDS | ENSORLG00000006803 |
| ENSORLT0000 CDS | CDS | ENSORLG00000015683 |
| ENSORLT0000 CDS | CDS | ENSORLG00000000335 |
| ENSORLT0000 CDS | CDS | ENSORLG00000003885 |
| ENSORLT0000 CDS | CDS | ENSORLG00000006721 |
| ENSORLT0000 CDS | CDS | ENSORLG00000015180 |
| ENSORLT0000 CDS | CDS | ENSORLG00000004722 |
| ENSORLT0000 CDS | CDS | ENSORLG00000004069 |
| ENSORLT0000 CDS | CDS | ENSORLG00000005675 |
| ENSORLT0000 CDS | CDS | ENSORLG00000009655 |
| ENSORLT0000 CDS | CDS | ENSORLG00000014005 |
| ENSORLT0000 CDS | CDS | ENSORLG00000014107 |
| ENSORLT0000 CDS | CDS | ENSORLG00000007304 |
| ENSORLT0000 CDS | CDS | ENSORLG00000006678 |
| ENSORLT0000 CDS | CDS | ENSORLG00000012273 |
| ENSORLT0000 CDS | CDS | ENSORLG00000014284 |
| ENSORLT0000 CDS | CDS | ENSORLG00000018414 |
| ENSORLT0000 CDS | CDS | ENSORLG00000009149 |
| ENSORLT0000 CDS | CDS | ENSORLG00000004339 |
| ENSORLT0000 CDS | CDS | ENSORLG00000004339 |
| ENSORLT0000 CDS | CDS | ENSORLG00000010253 |
| ENSORLT0000 CDS | CDS | ENSORLG00000014868 |
| ENSORLT0000 CDS | CDS | ENSORLG00000002482 |
| ENSORLT0000 CDS | CDS | ENSORLG00000016893 |
| ENSORLT0000 CDS | CDS | ENSORLG00000005221 |
| ENSORLT0000 CDS | CDS | ENSORLG00000011486 |
| ENSORLT0000 CDS | CDS | ENSORLG00000006343 |
| ENSORLT0000 CDS | CDS | ENSORLG00000008128 |
| ENSORLT0000 CDS | CDS | ENSORLG00000000754 |
| ENSORLT0000 CDS | CDS | ENSORLG00000006927 |
| ENSORLT0000 CDS | CDS | ENSORLG00000006927 |
| ENSORLT0000 CDS | CDS | ENSORLG00000009090 |
| ENSORLT0000 CDS | CDS | ENSORLG00000011733 |
| ENSORLT0000 CDS | CDS | ENSORLG00000015155 |
| ENSORLT0000 CDS | CDS | ENSORLG00000006476 |
| ENSORLT0000 CDS | CDS | ENSORLG00000005342 |
| ENSORLT0000 CDS | CDS | ENSORLG00000018938 |
| ENSORLT0000 CDS | CDS | ENSORLG00000012294 |
| ENSORLT0000 CDS | CDS | ENSORLG00000011414 |

|                  |     |                    |
|------------------|-----|--------------------|
| ENSORLT0000 CDS  | CDS | ENSORLG00000014038 |
| ENSORLT0000 CDS  | CDS | ENSORLG00000000780 |
| ENSORLT0000 CDS  | CDS | ENSORLG00000017439 |
| ENSORLT0000 CDS  | CDS | ENSORLG00000010789 |
| ENSORLT0000 CDS  | CDS | ENSORLG00000002854 |
| ENSORLT0000 CDS  | CDS | ENSORLG00000016135 |
| ENSORLT0000 CDS  | CDS | ENSORLG00000007406 |
| ENSORLT0000 CDS  | CDS | ENSORLG00000007406 |
| ENSORLT0000 CDS  | CDS | ENSORLG00000017635 |
| ENSORLT0000 CDS  | CDS | ENSORLG00000006135 |
| ENSORLT0000 CDS  | CDS | ENSORLG00000006135 |
| ENSORLT0000 CDS  | CDS | ENSORLG00000005502 |
| ENSORLT0000 CDS  | CDS | ENSORLG00000010348 |
| ENSORLT0000 CDS  | CDS | ENSORLG00000011194 |
| ENSORLT0000 CDS  | CDS | ENSORLG00000012529 |
| ENSORLT0000 CDS  | CDS | ENSORLG00000014576 |
| ENSORLT0000 CDS  | CDS | ENSORLG00000016092 |
| ENSORLT0000 CDS  | CDS | ENSORLG00000005452 |
| ENSORLT0000 CDS  | CDS | ENSORLG00000002755 |
| ENSORLT0000 CDS  | CDS | ENSORLG00000002755 |
| ENSORLT0000 CDS  | CDS | ENSORLG00000015825 |
| ENSORLT0000 CDS  | CDS | ENSORLG00000014947 |
| ENSORLT0000 CDS  | CDS | ENSORLG00000004718 |
| ENSORLT0000 CDS  | CDS | ENSORLG00000004718 |
| ENSORLT0000 CDS  | CDS | ENSORLG00000008891 |
| ENSORLT0000 CDS  | CDS | ENSORLG00000017098 |
| ENSORLT0000 CDS  | CDS | ENSORLG00000003353 |
| ENSORLT0000 CDS  | CDS | ENSORLG00000010271 |
| ENSORLT0000 CDS  | CDS | ENSORLG00000000583 |
| ENSORLT0000 CDS  | CDS | ENSORLG00000005243 |
| ENSORLT0000 CDS  | CDS | ENSORLG00000002814 |
| ENSORLT0000 CDS  | CDS | ENSORLG00000007572 |
| ENSORLT0000 3UTR | CDS | ENSORLG00000019070 |
| ENSORLT0000 CDS  | CDS | ENSORLG00000010438 |
| ENSORLT0000 CDS  | CDS | ENSORLG00000005124 |
| ENSORLT0000 CDS  | CDS | ENSORLG00000003115 |
| ENSORLT0000 CDS  | CDS | ENSORLG00000008271 |
| ENSORLT0000 CDS  | CDS | ENSORLG00000011316 |
| ENSORLT0000 CDS  | CDS | ENSORLG00000008651 |
| ENSORLT0000 CDS  | CDS | ENSORLG00000014048 |
| ENSORLT0000 CDS  | CDS | ENSORLG00000013698 |
| ENSORLT0000 CDS  | CDS | ENSORLG00000016356 |
| ENSORLT0000 CDS  | CDS | ENSORLG00000016356 |
| ENSORLT0000 CDS  | CDS | ENSORLG00000007854 |
| ENSORLT0000 CDS  | CDS | ENSORLG00000017625 |
| ENSORLT0000 CDS  | CDS | ENSORLG00000003838 |
| ENSORLT0000 CDS  | CDS | ENSORLG00000006292 |
| ENSORLT0000 CDS  | CDS | ENSORLG00000017589 |
| ENSORLT0000 CDS  | CDS | ENSORLG00000001466 |
| ENSORLT0000 CDS  | CDS | ENSORLG00000013388 |
| ENSORLT0000 CDS  | CDS | ENSORLG00000005535 |
| ENSORLT0000 CDS  | CDS | ENSORLG00000006402 |

|                 |     |                    |
|-----------------|-----|--------------------|
| ENSORLT0000 CDS | CDS | ENSORLG00000016819 |
| ENSORLT0000 CDS | CDS | ENSORLG00000014787 |
| ENSORLT0000 CDS | CDS | ENSORLG00000011520 |
| ENSORLT0000 CDS | CDS | ENSORLG00000015647 |
| ENSORLT0000 CDS | CDS | ENSORLG00000005715 |
| ENSORLT0000 CDS | CDS | ENSORLG00000013588 |
| ENSORLT0000 CDS | CDS | ENSORLG00000006597 |
| ENSORLT0000 CDS | CDS | ENSORLG00000013704 |
| ENSORLT0000 CDS | CDS | ENSORLG00000012143 |
| ENSORLT0000 CDS | CDS | ENSORLG00000005227 |
| ENSORLT0000 CDS | CDS | ENSORLG00000000111 |
| ENSORLT0000 CDS | CDS | ENSORLG00000009216 |
| ENSORLT0000 CDS | CDS | ENSORLG00000004787 |
| ENSORLT0000 CDS | CDS | ENSORLG00000006124 |
| ENSORLT0000 CDS | CDS | ENSORLG00000016677 |
| ENSORLT0000 CDS | CDS | ENSORLG00000003854 |
| ENSORLT0000 CDS | CDS | ENSORLG00000006500 |
| ENSORLT0000 CDS | CDS | ENSORLG00000006455 |
| ENSORLT0000 CDS | CDS | ENSORLG00000006004 |
| ENSORLT0000 CDS | CDS | ENSORLG00000013569 |
| ENSORLT0000 CDS | CDS | ENSORLG00000019526 |
| ENSORLT0000 CDS | CDS | ENSORLG00000012928 |
| ENSORLT0000 CDS | CDS | ENSORLG00000020394 |
| ENSORLT0000 CDS | CDS | ENSORLG00000014294 |
| ENSORLT0000 CDS | CDS | ENSORLG00000000479 |
| ENSORLT0000 CDS | CDS | ENSORLG00000011314 |
| ENSORLT0000 CDS | CDS | ENSORLG00000020132 |
| ENSORLT0000 CDS | CDS | ENSORLG00000008354 |
| ENSORLT0000 CDS | CDS | ENSORLG00000012985 |
| ENSORLT0000 CDS | CDS | ENSORLG00000002730 |
| ENSORLT0000 CDS | CDS | ENSORLG00000002730 |
| ENSORLT0000 CDS | CDS | ENSORLG00000018531 |
| ENSORLT0000 CDS | CDS | ENSORLG00000013530 |
| ENSORLT0000 CDS | CDS | ENSORLG00000008541 |
| ENSORLT0000 CDS | CDS | ENSORLG00000002944 |
| ENSORLT0000 CDS | CDS | ENSORLG00000020323 |
| ENSORLT0000 CDS | CDS | ENSORLG00000004102 |
| ENSORLT0000 CDS | CDS | ENSORLG00000010031 |
| ENSORLT0000 CDS | CDS | ENSORLG00000007264 |
| ENSORLT0000 CDS | CDS | ENSORLG00000008478 |
| ENSORLT0000 CDS | CDS | ENSORLG00000008073 |
| ENSORLT0000 CDS | CDS | ENSORLG00000012811 |
| ENSORLT0000 CDS | CDS | ENSORLG00000000794 |
| ENSORLT0000 CDS | CDS | ENSORLG00000001076 |
| ENSORLT0000 CDS | CDS | ENSORLG00000006926 |
| ENSORLT0000 CDS | CDS | ENSORLG00000019976 |
| ENSORLT0000 CDS | CDS | ENSORLG00000014361 |
| ENSORLT0000 CDS | CDS | ENSORLG00000018260 |
| ENSORLT0000 CDS | CDS | ENSORLG00000013529 |
| ENSORLT0000 CDS | CDS | ENSORLG00000013744 |
| ENSORLT0000 CDS | CDS | ENSORLG00000007549 |
| ENSORLT0000 CDS | CDS | ENSORLG00000006899 |

|                 |     |                    |
|-----------------|-----|--------------------|
| ENSORLT0000 CDS | CDS | ENSORLG00000018222 |
| ENSORLT0000 CDS | CDS | ENSORLG00000019677 |
| ENSORLT0000 CDS | CDS | ENSORLG00000011141 |
| ENSORLT0000 CDS | CDS | ENSORLG00000007583 |
| ENSORLT0000 CDS | CDS | ENSORLG00000008700 |
| ENSORLT0000 CDS | CDS | ENSORLG00000005936 |
| ENSORLT0000 CDS | CDS | ENSORLG00000000629 |
| ENSORLT0000 CDS | CDS | ENSORLG00000015810 |
| ENSORLT0000 CDS | CDS | ENSORLG00000008029 |
| ENSORLT0000 CDS | CDS | ENSORLG00000012833 |
| ENSORLT0000 CDS | CDS | ENSORLG00000011381 |
| ENSORLT0000 CDS | CDS | ENSORLG00000012890 |
| ENSORLT0000 CDS | CDS | ENSORLG00000010621 |
| ENSORLT0000 CDS | CDS | ENSORLG00000016940 |
| ENSORLT0000 CDS | CDS | ENSORLG00000020765 |
| ENSORLT0000 CDS | CDS | ENSORLG00000010249 |
| ENSORLT0000 CDS | CDS | ENSORLG00000004609 |
| ENSORLT0000 CDS | CDS | ENSORLG00000010423 |
| ENSORLT0000 CDS | CDS | ENSORLG00000015342 |
| ENSORLT0000 CDS | CDS | ENSORLG00000009600 |
| ENSORLT0000 CDS | CDS | ENSORLG00000010672 |
| ENSORLT0000 CDS | CDS | ENSORLG00000001174 |
| ENSORLT0000 CDS | CDS | ENSORLG00000006027 |
| ENSORLT0000 CDS | CDS | ENSORLG00000008697 |
| ENSORLT0000 CDS | CDS | ENSORLG00000011009 |
| ENSORLT0000 CDS | CDS | ENSORLG00000011732 |
| ENSORLT0000 CDS | CDS | ENSORLG00000011615 |
| ENSORLT0000 CDS | CDS | ENSORLG00000004757 |
| ENSORLT0000 CDS | CDS | ENSORLG00000004724 |
| ENSORLT0000 CDS | CDS | ENSORLG00000017271 |
| ENSORLT0000 CDS | CDS | ENSORLG00000004496 |
| ENSORLT0000 CDS | CDS | ENSORLG00000012299 |
| ENSORLT0000 CDS | CDS | ENSORLG00000008985 |
| ENSORLT0000 CDS | CDS | ENSORLG00000009427 |
| ENSORLT0000 CDS | CDS | ENSORLG00000003328 |
| ENSORLT0000 CDS | CDS | ENSORLG00000009184 |
| ENSORLT0000 CDS | CDS | ENSORLG00000009271 |
| ENSORLT0000 CDS | CDS | ENSORLG00000010079 |
| ENSORLT0000 CDS | CDS | ENSORLG00000017960 |
| ENSORLT0000 CDS | CDS | ENSORLG00000012678 |
| ENSORLT0000 CDS | CDS | ENSORLG00000006683 |
| ENSORLT0000 CDS | CDS | ENSORLG00000011355 |
| ENSORLT0000 CDS | CDS | ENSORLG00000003500 |
| ENSORLT0000 CDS | CDS | ENSORLG00000006599 |
| ENSORLT0000 CDS | CDS | ENSORLG00000015126 |
| ENSORLT0000 CDS | CDS | ENSORLG00000012084 |
| ENSORLT0000 CDS | CDS | ENSORLG00000015253 |
| ENSORLT0000 CDS | CDS | ENSORLG00000002614 |
| ENSORLT0000 CDS | CDS | ENSORLG00000018220 |
| ENSORLT0000 CDS | CDS | ENSORLG00000002997 |
| ENSORLT0000 CDS | CDS | ENSORLG00000010217 |
| ENSORLT0000 CDS | CDS | ENSORLG00000004589 |

|                 |     |                    |
|-----------------|-----|--------------------|
| ENSORLT0000 CDS | CDS | ENSORLG00000008138 |
| ENSORLT0000 CDS | CDS | ENSORLG00000015336 |
| ENSORLT0000 CDS | CDS | ENSORLG00000008775 |
| ENSORLT0000 CDS | CDS | ENSORLG00000013029 |
| ENSORLT0000 CDS | CDS | ENSORLG00000007709 |
| ENSORLT0000 CDS | CDS | ENSORLG00000014488 |
| ENSORLT0000 CDS | CDS | ENSORLG00000018012 |
| ENSORLT0000 CDS | CDS | ENSORLG00000018012 |
| ENSORLT0000 CDS | CDS | ENSORLG00000018012 |
| ENSORLT0000 CDS | CDS | ENSORLG00000008714 |
| ENSORLT0000 CDS | CDS | ENSORLG00000008991 |
| ENSORLT0000 CDS | CDS | ENSORLG00000003852 |
| ENSORLT0000 CDS | CDS | ENSORLG00000009595 |
| ENSORLT0000 CDS | CDS | ENSORLG00000013213 |
| ENSORLT0000 CDS | CDS | ENSORLG00000010898 |
| ENSORLT0000 CDS | CDS | ENSORLG00000005352 |
| ENSORLT0000 CDS | CDS | ENSORLG00000003456 |
| ENSORLT0000 CDS | CDS | ENSORLG00000010705 |
| ENSORLT0000 CDS | CDS | ENSORLG00000007771 |
| ENSORLT0000 CDS | CDS | ENSORLG00000001951 |
| ENSORLT0000 CDS | CDS | ENSORLG00000007177 |
| ENSORLT0000 CDS | CDS | ENSORLG00000020895 |
| ENSORLT0000 CDS | CDS | ENSORLG00000017902 |
| ENSORLT0000 CDS | CDS | ENSORLG00000002001 |
| ENSORLT0000 CDS | CDS | ENSORLG00000010449 |
| ENSORLT0000 CDS | CDS | ENSORLG00000009199 |
| ENSORLT0000 CDS | CDS | ENSORLG00000007223 |
| ENSORLT0000 CDS | CDS | ENSORLG00000014773 |
| ENSORLT0000 CDS | CDS | ENSORLG00000008302 |
| ENSORLT0000 CDS | CDS | ENSORLG00000014443 |
| ENSORLT0000 CDS | CDS | ENSORLG00000011817 |
| ENSORLT0000 CDS | CDS | ENSORLG00000017276 |
| ENSORLT0000 CDS | CDS | ENSORLG00000005241 |
| ENSORLT0000 CDS | CDS | ENSORLG0000001399  |
| ENSORLT0000 CDS | CDS | ENSORLG00000007842 |
| ENSORLT0000 CDS | CDS | ENSORLG00000011002 |
| ENSORLT0000 CDS | CDS | ENSORLG00000002036 |
| ENSORLT0000 CDS | CDS | ENSORLG00000014891 |
| ENSORLT0000 CDS | CDS | ENSORLG00000016613 |
| ENSORLT0000 CDS | CDS | ENSORLG00000010799 |
| ENSORLT0000 CDS | CDS | ENSORLG00000018129 |
| ENSORLT0000 CDS | CDS | ENSORLG00000016966 |
| ENSORLT0000 CDS | CDS | ENSORLG00000017287 |
| ENSORLT0000 CDS | CDS | ENSORLG00000019566 |
| ENSORLT0000 CDS | CDS | ENSORLG00000008315 |
| ENSORLT0000 CDS | CDS | ENSORLG00000008315 |
| ENSORLT0000 CDS | CDS | ENSORLG00000012904 |
| ENSORLT0000 CDS | CDS | ENSORLG00000004387 |
| ENSORLT0000 CDS | CDS | ENSORLG00000004387 |
| ENSORLT0000 CDS | CDS | ENSORLG00000009538 |
| ENSORLT0000 CDS | CDS | ENSORLG00000005829 |
| ENSORLT0000 CDS | CDS | ENSORLG00000009416 |

|                 |     |                    |
|-----------------|-----|--------------------|
| ENSORLT0000 CDS | CDS | ENSORLG00000006082 |
| ENSORLT0000 CDS | CDS | ENSORLG00000012008 |
| ENSORLT0000 CDS | CDS | ENSORLG00000017379 |
| ENSORLT0000 CDS | CDS | ENSORLG00000002912 |
| ENSORLT0000 CDS | CDS | ENSORLG00000007164 |
| ENSORLT0000 CDS | CDS | ENSORLG00000004570 |
| ENSORLT0000 CDS | CDS | ENSORLG00000003286 |
| ENSORLT0000 CDS | CDS | ENSORLG00000003673 |
| ENSORLT0000 CDS | CDS | ENSORLG00000005488 |
| ENSORLT0000 CDS | CDS | ENSORLG00000008035 |
| ENSORLT0000 CDS | CDS | ENSORLG00000001379 |
| ENSORLT0000 CDS | CDS | ENSORLG00000016873 |
| ENSORLT0000 CDS | CDS | ENSORLG00000016734 |
| ENSORLT0000 CDS | CDS | ENSORLG00000014882 |
| ENSORLT0000 CDS | CDS | ENSORLG00000003457 |
| ENSORLT0000 CDS | CDS | ENSORLG00000018576 |
| ENSORLT0000 CDS | CDS | ENSORLG00000018576 |
| ENSORLT0000 CDS | CDS | ENSORLG00000006828 |
| ENSORLT0000 CDS | CDS | ENSORLG00000016883 |
| ENSORLT0000 CDS | CDS | ENSORLG00000004091 |
| ENSORLT0000 CDS | CDS | ENSORLG00000013947 |
| ENSORLT0000 CDS | CDS | ENSORLG00000005971 |
| ENSORLT0000 CDS | CDS | ENSORLG00000011726 |
| ENSORLT0000 CDS | CDS | ENSORLG00000004014 |
| ENSORLT0000 CDS | CDS | ENSORLG00000006040 |
| ENSORLT0000 CDS | CDS | ENSORLG00000002926 |
| ENSORLT0000 CDS | CDS | ENSORLG00000002926 |
| ENSORLT0000 CDS | CDS | ENSORLG00000000182 |
| ENSORLT0000 CDS | CDS | ENSORLG00000012632 |
| ENSORLT0000 CDS | CDS | ENSORLG00000013559 |
| ENSORLT0000 CDS | CDS | ENSORLG00000018318 |
| ENSORLT0000 CDS | CDS | ENSORLG00000015999 |
| ENSORLT0000 CDS | CDS | ENSORLG00000013613 |
| ENSORLT0000 CDS | CDS | ENSORLG00000009372 |
| ENSORLT0000 CDS | CDS | ENSORLG00000001680 |
| ENSORLT0000 CDS | CDS | ENSORLG00000003667 |
| ENSORLT0000 CDS | CDS | ENSORLG00000003667 |
| ENSORLT0000 CDS | CDS | ENSORLG00000005486 |
| ENSORLT0000 CDS | CDS | ENSORLG00000003670 |
| ENSORLT0000 CDS | CDS | ENSORLG00000014123 |
| ENSORLT0000 CDS | CDS | ENSORLG00000005106 |
| ENSORLT0000 CDS | CDS | ENSORLG00000005709 |
| ENSORLT0000 CDS | CDS | ENSORLG00000015888 |
| ENSORLT0000 CDS | CDS | ENSORLG00000012096 |
| ENSORLT0000 CDS | CDS | ENSORLG00000020741 |
| ENSORLT0000 CDS | CDS | ENSORLG00000008174 |
| ENSORLT0000 CDS | CDS | ENSORLG00000011132 |
| ENSORLT0000 CDS | CDS | ENSORLG00000020365 |
| ENSORLT0000 CDS | CDS | ENSORLG00000020232 |
| ENSORLT0000 CDS | CDS | ENSORLG00000016189 |
| ENSORLT0000 CDS | CDS | ENSORLG00000010946 |
| ENSORLT0000 CDS | CDS | ENSORLG00000008620 |



|                  |      |                    |
|------------------|------|--------------------|
| ENSORLT0000 CDS  | CDS  | ENSORLG00000002861 |
| ENSORLT0000 CDS  | CDS  | ENSORLG00000014389 |
| ENSORLT0000 CDS  | CDS  | ENSORLG00000020481 |
| ENSORLT0000 CDS  | CDS  | ENSORLG00000013184 |
| ENSORLT0000 CDS  | CDS  | ENSORLG00000003633 |
| ENSORLT0000 CDS  | CDS  | ENSORLG00000003633 |
| ENSORLT0000 CDS  | CDS  | ENSORLG00000008359 |
| ENSORLT0000 CDS  | CDS  | ENSORLG00000010514 |
| ENSORLT0000 CDS  | CDS  | ENSORLG00000012782 |
| ENSORLT0000 CDS  | CDS  | ENSORLG00000019024 |
| ENSORLT0000 CDS  | CDS  | ENSORLG00000010486 |
| ENSORLT0000 CDS  | CDS  | ENSORLG00000013214 |
| ENSORLT0000 CDS  | CDS  | ENSORLG00000014164 |
| ENSORLT0000 CDS  | CDS  | ENSORLG00000007983 |
| ENSORLT0000 CDS  | CDS  | ENSORLG00000017390 |
| ENSORLT0000 CDS  | CDS  | ENSORLG00000009489 |
| ENSORLT0000 CDS  | CDS  | ENSORLG00000009366 |
| ENSORLT0000 CDS  | CDS  | ENSORLG00000015321 |
| ENSORLT0000 CDS  | CDS  | ENSORLG00000011373 |
| ENSORLT0000 CDS  | CDS  | ENSORLG00000009544 |
| ENSORLT0000 CDS  | CDS  | ENSORLG00000002450 |
| ENSORLT0000 CDS  | CDS  | ENSORLG00000011753 |
| ENSORLT0000 CDS  | CDS  | ENSORLG00000013112 |
| ENSORLT0000 CDS  | CDS  | ENSORLG00000017079 |
| ENSORLT0000 CDS  | CDS  | ENSORLG00000005598 |
| ENSORLT0000 CDS  | CDS  | ENSORLG00000007487 |
| ENSORLT0000 CDS  | CDS  | ENSORLG00000011356 |
| ENSORLT0000 CDS  | CDS  | ENSORLG00000020191 |
| ENSORLT0000 CDS  | CDS  | ENSORLG00000015037 |
| ENSORLT0000 CDS  | CDS  | ENSORLG00000000799 |
| ENSORLT0000 cDNA | cDNA | ENSORLG00000000607 |
| ENSORLT0000 CDNA | cDNA | ENSORLG00000013823 |
| ENSORLT0000 CDS  | CDS  | ENSORLG00000000705 |
| ENSORLT0000 CDS  | CDS  | ENSORLG00000001238 |
| ENSORLT0000 CDS  | CDS  | ENSORLG00000001697 |
| ENSORLT0000 5UTR | UTR5 | ENSORLG00000002043 |
| ENSORLT0000 CDS  | CDS  | ENSORLG00000002231 |
| ENSORLT0000 CDS  | CDS  | ENSORLG00000004593 |
| ENSORLT0000 CDS  | CDS  | ENSORLG00000005260 |
| ENSORLT0000 CDS  | CDS  | ENSORLG00000005616 |
| ENSORLT0000 CDS  | CDS  | ENSORLG00000005639 |
| ENSORLT0000 CDS  | CDS  | ENSORLG00000005770 |
| ENSORLT0000 CDS  | CDS  | ENSORLG00000006118 |
| ENSORLT0000 CDS  | CDS  | ENSORLG00000006140 |
| ENSORLT0000 CDS  | CDS  | ENSORLG00000006467 |
| ENSORLT0000 CDS  | CDS  | ENSORLG00000007035 |
| ENSORLT0000 CDS  | CDS  | ENSORLG00000008344 |
| ENSORLT0000 CDS  | CDS  | ENSORLG00000010637 |
| ENSORLT0000 CDS  | CDS  | ENSORLG00000010891 |
| ENSORLT0000 CDS  | CDS  | ENSORLG00000000035 |
| ENSORLT0000 3UTR | UTR3 | ENSORLG00000000227 |
| ENSORLT0000 CDS  | CDS  | ENSORLG00000001051 |

|                  |      |                    |
|------------------|------|--------------------|
| ENSORLT0000 CDS  | CDS  | ENSORLG00000001051 |
| ENSORLT0000 CDS  | CDS  | ENSORLG00000001322 |
| ENSORLT0000 CDS  | CDS  | ENSORLG00000001801 |
| ENSORLT0000 CDS  | CDS  | ENSORLG00000001869 |
| ENSORLT0000 CDS  | CDS  | ENSORLG00000004201 |
| ENSORLT0000 CDS  | CDS  | ENSORLG00000004413 |
| ENSORLT0000 CDS  | CDS  | ENSORLG00000004967 |
| ENSORLT0000 CDS  | CDS  | ENSORLG00000005223 |
| ENSORLT0000 CDS  | CDS  | ENSORLG00000005337 |
| ENSORLT0000 CDS  | CDS  | ENSORLG00000005533 |
| ENSORLT0000 CDS  | CDS  | ENSORLG00000006059 |
| ENSORLT0000 CDS  | CDS  | ENSORLG00000006146 |
| ENSORLT0000 CDS  | CDS  | ENSORLG00000006146 |
| ENSORLT0000 CDS  | CDS  | ENSORLG00000006233 |
| ENSORLT0000 CDS  | CDS  | ENSORLG00000006425 |
| ENSORLT0000 CDS  | CDS  | ENSORLG00000009071 |
| ENSORLT0000 CDS  | CDS  | ENSORLG00000009187 |
| ENSORLT0000 CDS  | CDS  | ENSORLG00000009995 |
| ENSORLT0000 CDS  | CDS  | ENSORLG00000010198 |
| ENSORLT0000 CDS  | CDS  | ENSORLG00000008177 |
| ENSORLT0000 CDS  | CDS  | ENSORLG00000000073 |
| ENSORLT0000 CDS  | CDS  | ENSORLG00000000514 |
| ENSORLT0000 CDS  | CDS  | ENSORLG00000003470 |
| ENSORLT0000 3UTR | UTR3 | ENSORLG00000006874 |
| ENSORLT0000 CDS  | CDS  | ENSORLG00000007097 |
| ENSORLT0000 CDS  | CDS  | ENSORLG00000007178 |
| ENSORLT0000 CDS  | CDS  | ENSORLG00000007224 |
| ENSORLT0000 CDS  | CDS  | ENSORLG00000009018 |
| ENSORLT0000 CDS  | CDS  | ENSORLG00000009359 |
| ENSORLT0000 CDS  | CDS  | ENSORLG00000000282 |
| ENSORLT0000 3UTR | UTR3 | ENSORLG00000000877 |
| ENSORLT0000 CDS  | CDS  | ENSORLG00000001531 |
| ENSORLT0000 CDS  | CDS  | ENSORLG00000002133 |
| ENSORLT0000 CDS  | CDS  | ENSORLG00000004073 |
| ENSORLT0000 CDS  | CDS  | ENSORLG00000004270 |
| ENSORLT0000 CDS  | CDS  | ENSORLG00000005966 |
| ENSORLT0000 CDS  | CDS  | ENSORLG00000006254 |
| ENSORLT0000 5UTR | UTR5 | ENSORLG00000009826 |
| ENSORLT0000 CDS  | CDS  | ENSORLG00000010390 |
| ENSORLT0000 CDS  | CDS  | ENSORLG00000001664 |
| ENSORLT0000 CDS  | CDS  | ENSORLG00000002124 |
| ENSORLT0000 CDS  | CDS  | ENSORLG00000003065 |
| ENSORLT0000 CDS  | CDS  | ENSORLG00000007843 |
| ENSORLT0000 CDS  | CDS  | ENSORLG00000008060 |
| ENSORLT0000 CDS  | CDS  | ENSORLG00000009880 |
| ENSORLT0000 CDS  | CDS  | ENSORLG00000010363 |
| ENSORLT0000 CDS  | CDS  | ENSORLG00000010944 |
| ENSORLT0000 CDS  | CDS  | ENSORLG00000011057 |
| ENSORLT0000 CDS  | CDS  | ENSORLG00000011584 |
| ENSORLT0000 3UTR | UTR3 | ENSORLG00000012363 |
| ENSORLT0000 3UTR | UTR3 | ENSORLG00000012745 |
| ENSORLT0000 CDS  | CDS  | ENSORLG00000013011 |

|                  |      |                    |
|------------------|------|--------------------|
| ENSORLT0000 CDS  | CDS  | ENSORLG00000013519 |
| ENSORLT0000 CDS  | CDS  | ENSORLG00000013780 |
| ENSORLT0000 CDS  | CDS  | ENSORLG00000014327 |
| ENSORLT0000 CDS  | CDS  | ENSORLG00000014328 |
| ENSORLT0000 CDS  | CDS  | ENSORLG00000015757 |
| ENSORLT0000 CDS  | CDS  | ENSORLG00000016591 |
| ENSORLT0000 CDS  | CDS  | ENSORLG00000016749 |
| ENSORLT0000 CDS  | CDS  | ENSORLG00000017703 |
| ENSORLT0000 CDS  | CDS  | ENSORLG00000014358 |
| ENSORLT0000 CDS  | CDS  | ENSORLG00000014880 |
| ENSORLT0000 CDS  | CDS  | ENSORLG00000014919 |
| ENSORLT0000 5UTR | UTR5 | ENSORLG00000015122 |
| ENSORLT0000 CDS  | CDS  | ENSORLG00000016025 |
| ENSORLT0000 CDS  | CDS  | ENSORLG00000016025 |
| ENSORLT0000 CDS  | CDS  | ENSORLG00000016679 |
| ENSORLT0000 CDS  | CDS  | ENSORLG00000016797 |
| ENSORLT0000 CDS  | CDS  | ENSORLG00000018021 |
| ENSORLT0000 CDS  | CDS  | ENSORLG00000018122 |
| ENSORLT0000 CDS  | CDS  | ENSORLG00000018232 |
| ENSORLT0000 CDS  | CDS  | ENSORLG00000018257 |
| ENSORLT0000 CDS  | CDS  | ENSORLG00000012830 |
| ENSORLT0000 CDS  | CDS  | ENSORLG00000013248 |
| ENSORLT0000 CDS  | CDS  | ENSORLG00000014433 |
| ENSORLT0000 CDS  | CDS  | ENSORLG00000014888 |
| ENSORLT0000 CDS  | CDS  | ENSORLG00000015151 |
| ENSORLT0000 CDS  | CDS  | ENSORLG00000017067 |
| ENSORLT0000 CDS  | CDS  | ENSORLG00000017454 |
| ENSORLT0000 CDS  | CDS  | ENSORLG00000018320 |
| ENSORLT0000 CDS  | CDS  | ENSORLG00000018644 |
| ENSORLT0000 CDS  | CDS  | ENSORLG00000018644 |
| ENSORLT0000 CDS  | CDS  | ENSORLG00000018900 |
| ENSORLT0000 CDS  | CDS  | ENSORLG00000019206 |
| ENSORLT0000 CDS  | CDS  | ENSORLG00000019382 |
| ENSORLT0000 cDNA | cDNA | ENSORLG00000019656 |
| ENSORLT0000 CDS  | CDS  | ENSORLG00000020274 |
| ENSORLT0000 CDS  | CDS  | ENSORLG00000020371 |
| ENSORLT0000 5UTR | UTR5 | ENSORLG00000020834 |
| ENSORLT0000 5UTR | UTR5 | ENSORLG00000020834 |
| ENSORLT0000 CDS  | CDS  | ENSORLG00000015888 |
| ENSORLT0000 CDS  | CDS  | ENSORLG00000015888 |
| ENSORLT0000 CDS  | CDS  | ENSORLG00000017079 |
| ENSORLT0000 CDS  | CDS  | ENSORLG00000011260 |
| ENSORLT0000 CDS  | CDS  | ENSORLG00000003852 |
| ENSORLT0000 CDS  | CDS  | ENSORLG00000008714 |
| ENSORLT0000 CDS  | CDS  | ENSORLG00000001164 |
| ENSORLT0000 CDS  | CDS  | ENSORLG00000005066 |
| ENSORLT0000 3UTR | UTR3 | ENSORLG00000017388 |
| ENSORLT0000 CDS  | CDS  | ENSORLG00000004573 |
| ENSORLT0000 3UTR | UTR3 | ENSORLG00000003787 |
| ENSORLT0000 CDS  | CDS  | ENSORLG00000009113 |
| ENSORLT0000 3UTR | CDS  | ENSORLG00000010905 |
| ENSORLT0000 CDS  | CDS  | ENSORLG00000001478 |

|                  |      |                    |
|------------------|------|--------------------|
| ENSORLT0000 CDS  | CDS  | ENSORLG00000001884 |
| ENSORLT0000 CDS  | CDS  | ENSORLG00000002336 |
| ENSORLT0000 CDS  | CDS  | ENSORLG00000002336 |
| ENSORLT0000 CDS  | CDS  | ENSORLG00000002422 |
| ENSORLT0000 CDS  | CDS  | ENSORLG00000003690 |
| ENSORLT0000 CDS  | CDS  | ENSORLG00000004897 |
| ENSORLT0000 CDS  | CDS  | ENSORLG00000005005 |
| ENSORLT0000 CDS  | CDS  | ENSORLG00000005709 |
| ENSORLT0000 CDS  | CDS  | ENSORLG00000005709 |
| ENSORLT0000 CDS  | CDS  | ENSORLG00000001225 |
| ENSORLT0000 CDS  | CDS  | ENSORLG00000002627 |
| ENSORLT0000 CDS  | CDS  | ENSORLG00000002854 |
| ENSORLT0000 CDS  | CDS  | ENSORLG00000003520 |
| ENSORLT0000 CDS  | CDS  | ENSORLG00000003520 |
| ENSORLT0000 CDS  | CDS  | ENSORLG00000008548 |
| ENSORLT0000 CDS  | CDS  | ENSORLG00000008878 |
| ENSORLT0000 CDS  | CDS  | ENSORLG00000005372 |
| ENSORLT0000 CDS  | CDS  | ENSORLG00000005658 |
| ENSORLT0000 CDS  | CDS  | ENSORLG00000005675 |
| ENSORLT0000 CDS  | CDS  | ENSORLG00000005675 |
| ENSORLT0000 CDS  | CDS  | ENSORLG00000005678 |
| ENSORLT0000 CDS  | CDS  | ENSORLG00000006082 |
| ENSORLT0000 CDS  | CDS  | ENSORLG00000006093 |
| ENSORLT0000 5UTR | UTR5 | ENSORLG00000006109 |
| ENSORLT0000 CDS  | CDS  | ENSORLG00000006171 |
| ENSORLT0000 CDS  | CDS  | ENSORLG00000006683 |
| ENSORLT0000 CDS  | CDS  | ENSORLG00000001079 |
| ENSORLT0000 CDS  | CDS  | ENSORLG00000002231 |
| ENSORLT0000 CDS  | CDS  | ENSORLG00000008344 |
| ENSORLT0000 CDS  | CDS  | ENSORLG00000008374 |
| ENSORLT0000 CDS  | CDS  | ENSORLG00000008374 |
| ENSORLT0000 CDS  | CDS  | ENSORLG00000008374 |
| ENSORLT0000 CDS  | CDS  | ENSORLG00000008111 |
| ENSORLT0000 CDS  | CDS  | ENSORLG00000010348 |
| ENSORLT0000 CDS  | CDS  | ENSORLG00000002001 |
| ENSORLT0000 CDS  | CDS  | ENSORLG00000002342 |
| ENSORLT0000 CDS  | CDS  | ENSORLG00000002427 |
| ENSORLT0000 CDS  | CDS  | ENSORLG00000002898 |
| ENSORLT0000 CDS  | CDS  | ENSORLG00000002904 |
| ENSORLT0000 CDS  | CDS  | ENSORLG00000003456 |
| ENSORLT0000 CDS  | CDS  | ENSORLG00000003838 |
| ENSORLT0000 CDS  | CDS  | ENSORLG00000003838 |
| ENSORLT0000 CDS  | CDS  | ENSORLG00000006079 |
| ENSORLT0000 CDS  | CDS  | ENSORLG00000002926 |
| ENSORLT0000 CDS  | CDS  | ENSORLG00000003138 |
| ENSORLT0000 CDS  | CDS  | ENSORLG00000006341 |
| ENSORLT0000 CDS  | CDS  | ENSORLG00000006782 |
| ENSORLT0000 CDS  | CDS  | ENSORLG00000006899 |
| ENSORLT0000 CDS  | CDS  | ENSORLG00000007836 |
| ENSORLT0000 CDS  | CDS  | ENSORLG00000008478 |
| ENSORLT0000 CDS  | CDS  | ENSORLG00000008478 |
| ENSORLT0000 CDS  | CDS  | ENSORLG00000006012 |

|                  |      |                    |
|------------------|------|--------------------|
| ENSORLT0000 CDS  | CDS  | ENSORLG00000009671 |
| ENSORLT0000 CDS  | CDS  | ENSORLG00000006914 |
| ENSORLT0000 CDS  | CDS  | ENSORLG00000007164 |
| ENSORLT0000 CDS  | CDS  | ENSORLG00000007304 |
| ENSORLT0000 CDS  | CDS  | ENSORLG00000007727 |
| ENSORLT0000 CDS  | CDS  | ENSORLG00000008057 |
| ENSORLT0000 CDS  | CDS  | ENSORLG00000008153 |
| ENSORLT0000 CDS  | CDS  | ENSORLG00000003006 |
| ENSORLT0000 CDS  | CDS  | ENSORLG00000003589 |
| ENSORLT0000 CDS  | CDS  | ENSORLG00000004339 |
| ENSORLT0000 CDS  | CDS  | ENSORLG00000005352 |
| ENSORLT0000 CDS  | CDS  | ENSORLG00000005535 |
| ENSORLT0000 CDS  | CDS  | ENSORLG00000009590 |
| ENSORLT0000 CDS  | CDS  | ENSORLG00000010171 |
| ENSORLT0000 CDS  | CDS  | ENSORLG00000000913 |
| ENSORLT0000 CDS  | CDS  | ENSORLG00000002730 |
| ENSORLT0000 CDS  | CDS  | ENSORLG00000009604 |
| ENSORLT0000 CDS  | CDS  | ENSORLG00000003670 |
| ENSORLT0000 CDS  | CDS  | ENSORLG00000004548 |
| ENSORLT0000 CDS  | CDS  | ENSORLG00000007983 |
| ENSORLT0000 CDS  | CDS  | ENSORLG00000008354 |
| ENSORLT0000 CDS  | CDS  | ENSORLG00000008700 |
| ENSORLT0000 CDS  | CDS  | ENSORLG00000009088 |
| ENSORLT0000 CDS  | CDS  | ENSORLG00000009256 |
| ENSORLT0000 CDS  | CDS  | ENSORLG00000010136 |
| ENSORLT0000 CDS  | CDS  | ENSORLG00000010396 |
| ENSORLT0000 CDS  | CDS  | ENSORLG00000000073 |
| ENSORLT0000 CDS  | CDS  | ENSORLG00000000073 |
| ENSORLT0000 CDS  | CDS  | ENSORLG00000000073 |
| ENSORLT0000 CDS  | CDS  | ENSORLG00000002699 |
| ENSORLT0000 CDS  | CDS  | ENSORLG00000003245 |
| ENSORLT0000 CDS  | CDS  | ENSORLG00000007672 |
| ENSORLT0000 CDS  | CDS  | ENSORLG00000000182 |
| ENSORLT0000 CDS  | CDS  | ENSORLG00000002312 |
| ENSORLT0000 CDS  | CDS  | ENSORLG00000003500 |
| ENSORLT0000 CDS  | CDS  | ENSORLG00000005344 |
| ENSORLT0000 CDS  | CDS  | ENSORLG00000005502 |
| ENSORLT0000 CDS  | CDS  | ENSORLG00000006499 |
| ENSORLT0000 CDS  | CDS  | ENSORLG00000006870 |
| ENSORLT0000 CDS  | CDS  | ENSORLG00000007701 |
| ENSORLT0000 CDS  | CDS  | ENSORLG00000007980 |
| ENSORLT0000 CDS  | CDS  | ENSORLG00000008937 |
| ENSORLT0000 CDS  | CDS  | ENSORLG00000010799 |
| ENSORLT0000 CDS  | CDS  | ENSORLG00000004613 |
| ENSORLT0000 CDS  | CDS  | ENSORLG00000010732 |
| ENSORLT0000 5UTR | UTR5 | ENSORLG00000002648 |
| ENSORLT0000 CDS  | CDS  | ENSORLG00000006803 |
| ENSORLT0000 CDS  | CDS  | ENSORLG00000007431 |
| ENSORLT0000 CDS  | CDS  | ENSORLG00000007431 |
| ENSORLT0000 CDS  | CDS  | ENSORLG00000007525 |
| ENSORLT0000 CDS  | CDS  | ENSORLG00000007525 |
| ENSORLT0000 CDS  | CDS  | ENSORLG00000007525 |

|                  |      |                    |
|------------------|------|--------------------|
| ENSORLT0000 CDS  | CDS  | ENSORLG00000008337 |
| ENSORLT0000 CDS  | CDS  | ENSORLG00000010119 |
| ENSORLT0000 CDS  | CDS  | ENSORLG00000010778 |
| ENSORLT0000 CDS  | CDS  | ENSORLG00000010778 |
| ENSORLT0000 CDS  | CDS  | ENSORLG00000002686 |
| ENSORLT0000 5UTR | UTR5 | ENSORLG00000008464 |
| ENSORLT0000 CDS  | CDS  | ENSORLG00000008616 |
| ENSORLT0000 CDS  | CDS  | ENSORLG00000010390 |
| ENSORLT0000 CDS  | CDS  | ENSORLG00000001284 |
| ENSORLT0000 CDS  | CDS  | ENSORLG00000004453 |
| ENSORLT0000 CDS  | CDS  | ENSORLG00000007952 |
| ENSORLT0000 CDS  | CDS  | ENSORLG00000010741 |
| ENSORLT0000 CDS  | CDS  | ENSORLG00000010741 |
| ENSORLT0000 CDS  | CDS  | ENSORLG00000011554 |
| ENSORLT0000 CDS  | CDS  | ENSORLG00000011554 |
| ENSORLT0000 CDS  | CDS  | ENSORLG00000011579 |
| ENSORLT0000 CDS  | CDS  | ENSORLG00000012270 |
| ENSORLT0000 CDS  | CDS  | ENSORLG00000012678 |
| ENSORLT0000 CDS  | CDS  | ENSORLG00000012680 |
| ENSORLT0000 CDS  | CDS  | ENSORLG00000012833 |
| ENSORLT0000 CDS  | CDS  | ENSORLG00000012833 |
| ENSORLT0000 CDS  | CDS  | ENSORLG00000012833 |
| ENSORLT0000 CDS  | CDS  | ENSORLG00000014325 |
| ENSORLT0000 CDS  | CDS  | ENSORLG00000014518 |
| ENSORLT0000 CDS  | CDS  | ENSORLG00000014631 |
| ENSORLT0000 CDS  | CDS  | ENSORLG00000014884 |
| ENSORLT0000 CDS  | CDS  | ENSORLG00000015508 |
| ENSORLT0000 CDS  | CDS  | ENSORLG00000012299 |
| ENSORLT0000 CDS  | CDS  | ENSORLG00000012299 |
| ENSORLT0000 CDS  | CDS  | ENSORLG00000012632 |
| ENSORLT0000 CDS  | CDS  | ENSORLG00000012680 |
| ENSORLT0000 CDS  | CDS  | ENSORLG00000013112 |
| ENSORLT0000 CDS  | CDS  | ENSORLG00000013815 |
| ENSORLT0000 CDS  | CDS  | ENSORLG00000014164 |
| ENSORLT0000 5UTR | UTR5 | ENSORLG00000011858 |
| ENSORLT0000 CDNA | cDNA | ENSORLG00000012724 |
| ENSORLT0000 CDS  | CDS  | ENSORLG00000014576 |
| ENSORLT0000 CDS  | CDS  | ENSORLG00000014781 |
| ENSORLT0000 CDS  | CDS  | ENSORLG00000014810 |
| ENSORLT0000 CDS  | CDS  | ENSORLG00000015037 |
| ENSORLT0000 CDS  | CDS  | ENSORLG00000016157 |
| ENSORLT0000 CDS  | CDS  | ENSORLG00000016189 |
| ENSORLT0000 CDS  | CDS  | ENSORLG00000016224 |
| ENSORLT0000 CDS  | CDS  | ENSORLG00000012776 |
| ENSORLT0000 CDS  | CDS  | ENSORLG00000012779 |
| ENSORLT0000 3UTR | UTR3 | ENSORLG00000013527 |
| ENSORLT0000 3UTR | UTR5 | ENSORLG00000013527 |
| ENSORLT0000 5UTR | UTR3 | ENSORLG00000013527 |
| ENSORLT0000 5UTR | UTR5 | ENSORLG00000013527 |
| ENSORLT0000 CDS  | CDS  | ENSORLG00000013992 |
| ENSORLT0000 CDS  | CDS  | ENSORLG00000014129 |
| ENSORLT0000 CDS  | CDS  | ENSORLG00000014469 |

|                  |      |                    |
|------------------|------|--------------------|
| ENSORLT0000 CDS  | CDS  | ENSORLG00000015563 |
| ENSORLT0000 CDS  | CDS  | ENSORLG00000016915 |
| ENSORLT0000 CDS  | CDS  | ENSORLG00000012076 |
| ENSORLT0000 CDS  | CDS  | ENSORLG00000013744 |
| ENSORLT0000 CDS  | CDS  | ENSORLG00000013827 |
| ENSORLT0000 CDS  | CDS  | ENSORLG00000014338 |
| ENSORLT0000 CDS  | CDS  | ENSORLG00000016946 |
| ENSORLT0000 CDS  | CDS  | ENSORLG00000017465 |
| ENSORLT0000 CDS  | CDS  | ENSORLG00000017960 |
| ENSORLT0000 CDS  | CDS  | ENSORLG00000012890 |
| ENSORLT0000 CDS  | CDS  | ENSORLG00000012890 |
| ENSORLT0000 CDS  | CDS  | ENSORLG00000015273 |
| ENSORLT0000 CDS  | CDS  | ENSORLG00000015742 |
| ENSORLT0000 CDS  | CDS  | ENSORLG00000015767 |
| ENSORLT0000 CDS  | CDS  | ENSORLG00000017234 |
| ENSORLT0000 CDS  | CDS  | ENSORLG00000017804 |
| ENSORLT0000 5UTR | UTR5 | ENSORLG00000012199 |
| ENSORLT0000 CDS  | CDS  | ENSORLG00000013616 |
| ENSORLT0000 CDS  | CDS  | ENSORLG00000013991 |
| ENSORLT0000 CDS  | CDS  | ENSORLG00000015436 |
| ENSORLT0000 CDS  | CDS  | ENSORLG00000016735 |
| ENSORLT0000 3UTR | UTR3 | ENSORLG00000017948 |
| ENSORLT0000 CDS  | CDS  | ENSORLG00000015040 |
| ENSORLT0000 CDS  | CDS  | ENSORLG00000015040 |
| ENSORLT0000 CDS  | CDS  | ENSORLG00000015913 |
| ENSORLT0000 3UTR | UTR3 | ENSORLG00000016165 |
| ENSORLT0000 CDS  | CDS  | ENSORLG00000016305 |
| ENSORLT0000 CDS  | CDS  | ENSORLG00000016915 |
| ENSORLT0000 CDS  | CDS  | ENSORLG00000017764 |
| ENSORLT0000 CDS  | CDS  | ENSORLG00000014443 |
| ENSORLT0000 CDS  | CDS  | ENSORLG00000015683 |
| ENSORLT0000 CDS  | CDS  | ENSORLG00000013379 |
| ENSORLT0000 CDS  | CDS  | ENSORLG00000014287 |
| ENSORLT0000 CDS  | CDS  | ENSORLG00000015151 |
| ENSORLT0000 CDS  | CDS  | ENSORLG00000015462 |
| ENSORLT0000 CDS  | CDS  | ENSORLG00000016883 |
| ENSORLT0000 CDS  | CDS  | ENSORLG00000016883 |
| ENSORLT0000 5UTR | UTR5 | ENSORLG00000018531 |
| ENSORLT0000 CDS  | CDS  | ENSORLG00000018794 |
| ENSORLT0000 CDS  | CDS  | ENSORLG00000018938 |
| ENSORLT0000 CDS  | CDS  | ENSORLG00000019403 |
| ENSORLT0000 3UTR | UTR3 | ENSORLG00000020656 |
| ENSORLT0000 CDS  | CDS  | ENSORLG00000019583 |
| ENSORLT0000 CDS  | CDS  | ENSORLG00000018341 |
| ENSORLT0000 cDNA | cDNA | ENSORLG00000018644 |
| ENSORLT0000 CDS  | CDS  | ENSORLG00000018679 |
| ENSORLT0000 CDS  | CDS  | ENSORLG00000019927 |
| ENSORLT0000 cDNA | cDNA | ENSORLG00000020257 |
| ENSORLT0000 CDS  | CDS  | ENSORLG00000020371 |

Gene common name

uracil phosphoribosyltransferase (FUR1) homolog (*S. cerevisiae*)  
UDP-glucose glycoprotein glucosyltransferase 1 [Source:ZFIN;Acc:ZDB-GENE-050417-3]  
SUZ RNA binding domain containing 1 [Source:HGNC Symbol]  
septin 10 [Source:ZFIN;Acc:ZDB-GENE-050417-3]  
ring finger protein 170 [Source:ZFIN;Acc:ZDB-GENE-040426-1]  
RAB18B, member RAS oncogene family [Source:ZFIN;Acc:ZDB-GENE-040426-1]  
pdp2  
oxysterol binding protein-like 2b [Source:ZFIN;Acc:ZDB-GENE-050417-3]  
NT5C3B (1 of many)  
itpk1b  
growth factor receptor-bound protein 2b [Source:ZFIN;Acc:ZDB-GENE-040426-1]  
growth factor receptor-bound protein 2b [Source:ZFIN;Acc:ZDB-GENE-040426-1]  
dusp1  
charged multivesicular body protein 2Ba [Source:ZFIN;Acc:ZDB-GENE-030131-9638]  
basigin [Source:ZFIN;Acc:ZDB-GENE-030131-9638]  
voltage-dependent anion channel 1 [Source:ZFIN;Acc:ZDB-GENE-040426-1]  
proteasome subunit beta 1 [Source:ZFIN;Acc:ZDB-GENE-040426-1]  
prkaa1  
pirin [Source:ZFIN;Acc:ZDB-GENE-040718-288]  
*Oryzias latipes* signal transducer and activator of transcription 1  
nudix hydrolase 13 [Source:HGNC Symbol;Acc:HGNC:18827]  
NECAP endocytosis associated 2 [Source:ZFIN;Acc:ZDB-GENE-040426-1]  
laccase (multicopper oxidoreductase) domain containing 1 [Source:ZFIN;Acc:ZDB-GENE-040426-1]  
intraflagellar transport 52 homolog (*Chlamydomonas*) [Source:ZFIN;Acc:ZDB-GENE-040426-1]  
fkbp1ab  
fkbp1aa  
DEAD (Asp-Glu-Ala-Asp) box helicase 3a [Source:ZFIN;Acc:ZDB-GENE-030131-9638]  
clock circadian regulator b [Source:ZFIN;Acc:ZDB-GENE-030131-9638]  
capping actin protein of muscle Z-line alpha subunit 2 [Source:ZFIN;Acc:ZDB-GENE-030131-9638]  
AHA1, activator of heat shock protein ATPase homolog 1b [Source:ZFIN;Acc:ZDB-GENE-030131-9638]  
adc7  
acyl-CoA synthetase short chain family member 3 [Source:ZFIN;Acc:ZDB-GENE-030131-9638]  
aconitase 1, soluble [Source:ZFIN;Acc:ZDB-GENE-031118-76]  
zmp:0000000846 [Source:ZFIN;Acc:ZDB-GENE-130530-849]  
zinc finger protein 711 [Source:ZFIN;Acc:ZDB-GENE-081107-1]  
zinc finger protein 592 [Source:ZFIN;Acc:ZDB-GENE-030131-9638]  
zinc finger protein 292a [Source:ZFIN;Acc:ZDB-GENE-071004-1]  
zinc finger homeobox 4 [Source:ZFIN;Acc:ZDB-GENE-070530-1]  
zinc finger homeobox 3 [Source:ZFIN;Acc:ZDB-GENE-030131-9638]  
zinc finger CCCH-type containing 18 [Source:ZFIN;Acc:ZDB-GENE-030131-9638]  
zinc finger and BTB domain containing 5 [Source:HGNC Symbol]  
zinc family member 1 (odd-paired homolog, *Drosophila*) [Source:ZFIN;Acc:ZDB-GENE-030131-9638]  
zgc:66449 [Source:ZFIN;Acc:ZDB-GENE-030131-9638]  
zgc:56231 [Source:ZFIN;Acc:ZDB-GENE-040426-1914]  
zgc:136929 [Source:ZFIN;Acc:ZDB-GENE-060421-4235]  
zgc:110269 [Source:ZFIN;Acc:ZDB-GENE-050417-81]  
YTH N(6)-methyladenosine RNA binding protein 2 [Source:ZFIN;Acc:ZDB-GENE-091118-1]  
WSC domain containing 1b [Source:ZFIN;Acc:ZDB-GENE-091118-1]  
wolframin ER transmembrane glycoprotein [Source:HGNC Symbol]  
WNK4  
Wiskott-Aldrich syndrome (eczema-thrombocytopenia) a [Source:ZFIN;Acc:ZDB-GENE-030131-9638]



WD repeat domain 47a [Source:ZFIN;Acc:ZDB-GENE-070216  
WD repeat and FYVE domain containing 3 [Source:ZFIN;Acc:  
WD repeat and FYVE domain containing 1 [Source:ZFIN;Acc:  
von Willebrand factor A domain containing 2 [Source:ZFIN;A  
very low density lipoprotein receptor [Source:ZFIN;Acc:ZDB-  
valosin containing protein [Source:ZFIN;Acc:ZDB-GENE-0301  
utrophin [Source:ZFIN;Acc:ZDB-GENE-070228-6]  
usp16  
uroporphyrinogen decarboxylase [Source:ZFIN;Acc:ZDB-GEN  
unc-50 homolog (C. elegans) [Source:ZFIN;Acc:ZDB-GENE-04  
UDP-glucose glycoprotein glucosyltransferase 2 [Source:ZFI  
tumor necrosis factor receptor superfamily, member 21 [So  
tudor domain containing 1 [Source:ZFIN;Acc:ZDB-GENE-070  
tubulin, alpha 8 like 3 [Source:ZFIN;Acc:ZDB-GENE-040801-7  
Tu translation elongation factor, mitochondrial [Source:ZFIN  
tRNA methyltransferase 11 homolog (S. cerevisiae) [Source:  
tRNA aspartic acid methyltransferase 1 [Source:ZFIN;Acc:ZD  
tRNA aspartic acid methyltransferase 1 [Source:ZFIN;Acc:ZD  
tripartite motif containing 66 [Source:ZFIN;Acc:ZDB-GENE-0  
trip12  
trichorhinophalangeal syndrome I [Source:ZFIN;Acc:ZDB-GE  
trhde.2  
transportin 1 [Source:ZFIN;Acc:ZDB-GENE-080819-1]  
transmembrane p24 trafficking protein 4 [Source:ZFIN;Acc:Z  
transient receptor potential cation channel, subfamily M, m  
transient receptor potential cation channel, subfamily M, m  
transient receptor potential cation channel, subfamily C, me  
transient receptor potential cation channel, subfamily A, me  
transgelin 2 [Source:ZFIN;Acc:ZDB-GENE-020802-2]  
transforming growth factor, beta 2, like [Source:ZFIN;Acc:ZC  
transducin (beta)-like 2 [Source:ZFIN;Acc:ZDB-GENE-030131  
tight junction protein 1b [Source:ZFIN;Acc:ZDB-GENE-07092  
THUMP domain containing 3 [Source:ZFIN;Acc:ZDB-GENE-0  
tetraspanin 33a [Source:ZFIN;Acc:ZDB-GENE-040718-361]  
teneurin transmembrane protein 3 [Source:HGNC Symbol;A  
TBC1 domain family, member 30 [Source:ZFIN;Acc:ZDB-GEN  
TAF1 RNA polymerase II, TATA box binding protein (TBP)-ass  
synaptotagmin X [Source:ZFIN;Acc:ZDB-GENE-041210-297]  
syk  
SWI/SNF related, matrix associated, actin dependent regula  
sushi, nidogen and EGF-like domains 1 [Source:ZFIN;Acc:ZDE  
sulfotransferase family, cytosolic, 6b, member 1 [Source:ZFI  
structural maintenance of chromosomes 2 [Source:ZFIN;Acc  
STIM activating enhance [Source:ZFIN;Acc:ZDB-GENE-04042  
stearoyl-CoA desaturase (delta-9-desaturase) [Source:ZFIN;/  
SRY (sex determining region Y)-box 18 [Source:ZFIN;Acc:ZDE  
splA/ryanodine receptor domain and SOCS box containing 3  
spinster homolog 3 (Drosophila) [Source:ZFIN;Acc:ZDB-GENI  
sphingolipid transporter 2 [Source:HGNC Symbol;Acc:HGNC  
spermatogenesis associated 5-like 1 [Source:ZFIN;Acc:ZDB-C  
spectrin, beta, erythrocytic [Source:ZFIN;Acc:ZDB-GENE-000  
spalt-like transcription factor 1a [Source:ZFIN;Acc:ZDB-GENE

sorting nexin 2 [Source:ZFIN;Acc:ZDB-GENE-051120-45]  
solute carrier organic anion transporter family, member 1C1  
solute carrier family 7 (cationic amino acid transporter, y+ s  
solute carrier family 6 (neurotransmitter transporter), mem  
solute carrier family 4 member 10 [Source:HGNC Symbol;Ac  
solute carrier family 38, member 11 [Source:ZFIN;Acc:ZDB-G  
solute carrier family 35, member E3 [Source:ZFIN;Acc:ZDB-G  
solute carrier family 30 (zinc transporter), member 2 [Sourc  
solute carrier family 27 (fatty acid transporter), member 2a  
solute carrier family 2 member 4 [Source:HGNC Symbol;Acc  
solute carrier family 2 (facilitated glucose transporter), mem  
solute carrier family 16, member 7 (monocarboxylic acid tra  
small nuclear ribonucleoprotein 27 (U4/U6.U5) [Source:ZFIN  
SMAD family member 3b [Source:ZFIN;Acc:ZDB-GENE-0301  
SMAD family member 2 [Source:ZFIN;Acc:ZDB-GENE-99060  
slit homolog 3 (Drosophila) [Source:ZFIN;Acc:ZDB-GENE-010  
single stranded DNA binding protein 3b [Source:ZFIN;Acc:ZC  
signal-induced proliferation-associated 1 like 3 [Source:ZFIN  
signal transducer and activator of transcription 4 [Source:ZF  
si:dkey-243i1.1 [Source:ZFIN;Acc:ZDB-GENE-030131-6399]  
si:dkey-183c6.8 [Source:ZFIN;Acc:ZDB-GENE-160728-23]  
si:dkey-166k12.1 [Source:ZFIN;Acc:ZDB-GENE-120215-78]  
si:dkey-160o24.3  
si:ch73-170l17.1  
si:ch211-79l17.1 [Source:ZFIN;Acc:ZDB-GENE-050419-127]  
si:ch211-217a12.1 [Source:ZFIN;Acc:ZDB-GENE-121214-95]  
si:ch211-160d20.3 [Source:ZFIN;Acc:ZDB-GENE-030131-890  
si:ch211-14a17.6 [Source:ZFIN;Acc:ZDB-GENE-030616-589]  
si:ch211-125m10.6 [Source:ZFIN;Acc:ZDB-GENE-120709-92]  
si:ch1073-335m2.2 [Source:ZFIN;Acc:ZDB-GENE-081104-82]  
si:ch1073-228j22.2 [Source:ZFIN;Acc:ZDB-GENE-110411-227  
short chain dehydrogenase/reductase family 16C, member !  
short chain dehydrogenase/reductase family 16C, member !  
sephs1  
sema domain, transmembrane domain (TM), and cytoplasm  
SAS-6 centriolar assembly protein [Source:ZFIN;Acc:ZDB-GEI  
ryanodine receptor 3 [Source:HGNC Symbol;Acc:HGNC:1048  
ryanodine receptor 2b (cardiac) [Source:ZFIN;Acc:ZDB-GENE  
rngtt  
ring finger protein 24 [Source:ZFIN;Acc:ZDB-GENE-041114-4  
ring finger protein 111 [Source:ZFIN;Acc:ZDB-GENE-070808-  
rhomboid 5 homolog 2 [Source:HGNC Symbol;Acc:HGNC:20  
Rho GTPase activating protein 35a [Source:ZFIN;Acc:ZDB-GE  
Rho GTPase activating protein 35a [Source:ZFIN;Acc:ZDB-GE  
Rho GTPase activating protein 17b [Source:ZFIN;Acc:ZDB-GE  
Rh family, C glycoprotein b [Source:ZFIN;Acc:ZDB-GENE-040  
rev3l  
retinoid x receptor, beta a [Source:ZFIN;Acc:ZDB-GENE-9805  
regulatory factor X7b [Source:ZFIN;Acc:ZDB-GENE-170623-1  
regucalcin [Source:ZFIN;Acc:ZDB-GENE-040718-68]  
RecQ helicase-like 5 [Source:ZFIN;Acc:ZDB-GENE-071214-1]  
Ras association domain family member 8 [Source:HGNC Syn

RAP1 GTPase activating protein 2a [Source:ZFIN;Acc:ZDB-GE  
Ral GTPase activating protein, beta subunit (non-catalytic) [S  
Ral GTPase activating protein, alpha subunit 2 (catalytic) [So  
RAB38, member RAS oncogene family [Source:HGNC Symbo  
RAB30, member RAS oncogene family [Source:ZFIN;Acc:ZDB  
RAB25, member RAS oncogene family b [Source:ZFIN;Acc:Z  
RAB14, member RAS oncogene family [Source:ZFIN;Acc:ZDB  
RAB14, member RAS oncogene family [Source:ZFIN;Acc:ZDB  
RAB10, member RAS oncogene family [Source:ZFIN;Acc:ZDB  
Rab interacting lysosomal protein-like 2 [Source:ZFIN;Acc:Z  
Rab interacting lysosomal protein-like 2 [Source:ZFIN;Acc:Z  
R3H domain containing 2 [Source:HGNC Symbol;Acc:HGNC.:  
pyrimidinergic receptor P2Y6 [Source:HGNC Symbol;Acc:HG  
ptgr2  
prpf4bb  
protein phosphatase 2 regulatory subunit B'gamma [Source  
protein O-fucosyltransferase 2 [Source:ZFIN;Acc:ZDB-GENE-  
protein kinase, DNA-activated, catalytic polypeptide [Source  
proteasome subunit beta 6 [Source:ZFIN;Acc:ZDB-GENE-990  
proteasome subunit beta 6 [Source:ZFIN;Acc:ZDB-GENE-990  
proteasome 26S subunit, ATPase 1a [Source:ZFIN;Acc:ZDB-G  
prospero homeobox 1a [Source:ZFIN;Acc:ZDB-GENE-980526  
proline and serine rich 1 [Source:ZFIN;Acc:ZDB-GENE-11100  
proline and serine rich 1 [Source:ZFIN;Acc:ZDB-GENE-11100  
ppifb  
ppic  
potassium channel, voltage gated eag related subfamily H, r  
potassium channel tetramerization domain containing 6b [S  
polybromo 1 [Source:ZFIN;Acc:ZDB-GENE-080926-4]  
polq  
plexin b2b [Source:ZFIN;Acc:ZDB-GENE-080902-1]  
pkd112a  
pirin [Source:ZFIN;Acc:ZDB-GENE-040718-288]  
phospholipase A2, group VI (cytosolic, calcium-independent  
phospholipase A2-activating protein [Source:ZFIN;Acc:ZDB-G  
phospho1  
phosphatidylinositol-3,4,5-trisphosphate-dependent Rac exi  
phosphatidylinositol glycan anchor biosynthesis, class W [Sc  
phosphatidylinositol glycan anchor biosynthesis, class B [So  
phosphate regulating endopeptidase homolog, X-linked [So  
PHD finger protein 12b [Source:ZFIN;Acc:ZDB-GENE-110628  
peptidoglycan recognition protein 6 [Source:ZFIN;Acc:ZDB-G  
peptidoglycan recognition protein 6 [Source:ZFIN;Acc:ZDB-G  
PDZ and LIM domain 5b [Source:ZFIN;Acc:ZDB-GENE-040426  
pcmt  
pantothenate kinase 1a [Source:ZFIN;Acc:ZDB-GENE-040426  
p53-induced death domain protein 1 [Source:ZFIN;Acc:ZDB-  
oxysterol binding protein-like 6 [Source:ZFIN;Acc:ZDB-GENE  
oxysterol binding protein-like 1A [Source:ZFIN;Acc:ZDB-GEN  
otoferlin a [Source:ZFIN;Acc:ZDB-GENE-030131-7778]  
Oryzias latipes RAD21 cohesin complex component (rad21),  
Oryzias latipes fucosyltransferase 11 (fut11), mRNA. [Source

Oryzias latipes estrogen-related receptor gamma type 2 (err  
origin recognition complex, subunit 3 [Source:ZFIN;Acc:ZDB-  
origin recognition complex, subunit 2 [Source:ZFIN;Acc:ZDB-  
opsin 5 [Source:ZFIN;Acc:ZDB-GENE-041001-179]  
olfactory receptor C family, g6 [Source:ZFIN;Acc:ZDB-GENE-  
nucleoporin 35 [Source:HGNC Symbol;Acc:HGNC:29797]  
nucleoporin 214 [Source:ZFIN;Acc:ZDB-GENE-110203-3]  
nuclear receptor coactivator 3 [Source:ZFIN;Acc:ZDB-GENE-  
nuclear receptor coactivator 3 [Source:HGNC Symbol;Acc:HG  
ntrk2a  
npepps  
nmt2  
NHL repeat containing 2 [Source:ZFIN;Acc:ZDB-GENE-10031  
neuroguidin, EIF4E binding protein [Source:ZFIN;Acc:ZDB-GE  
neuroblastoma amplified sequence [Source:ZFIN;Acc:ZDB-G  
neurobeachin a [Source:ZFIN;Acc:ZDB-GENE-050320-68]  
neuralized E3 ubiquitin protein ligase 4 [Source:ZFIN;Acc:ZD  
neu4  
Nedd4 family interacting protein 1 [Source:ZFIN;Acc:ZDB-GE  
nedd4 binding protein 1 [Source:ZFIN;Acc:ZDB-GENE-03013  
NCK-associated protein 1 [Source:ZFIN;Acc:ZDB-GENE-0301:  
naprt  
N-acylsphingosine amidohydrolase 2 [Source:ZFIN;Acc:ZDB-  
N-acetyl-alpha-glucosaminidase [Source:HGNC Symbol;Acc:l  
myosin, heavy chain 9a, non-muscle [Source:ZFIN;Acc:ZDB-C  
myosin XIX [Source:ZFIN;Acc:ZDB-GENE-140106-116]  
myosin light chain kinase b [Source:ZFIN;Acc:ZDB-GENE-041  
myocardial zonula adherens protein [Source:ZFIN;Acc:ZDB-C  
myo3a  
myelin expression factor 2 [Source:ZFIN;Acc:ZDB-GENE-051:  
myelin expression factor 2 [Source:ZFIN;Acc:ZDB-GENE-051:  
muscle-specific beta 1 integrin binding protein [Source:ZFIN  
multiple EGF-like-domains 8 [Source:ZFIN;Acc:ZDB-GENE-09  
msra  
Mov10 RISC complex RNA helicase like 1 [Source:HGNC Sym  
MMS19 homolog, cytosolic iron-sulfur assembly component  
mitoguardin 2 [Source:ZFIN;Acc:ZDB-GENE-050320-135]  
mitogen-activated protein kinase 8 interacting protein 2 [So  
mitochondrial fission process 1 [Source:HGNC Symbol;Acc:H  
meningioma expressed antigen 5 (hyaluronidase) [Source:ZI  
membrane associated guanylate kinase, WW and PDZ doma  
melanocortin 2 receptor accessory protein 2b [Source:ZFIN;  
mediator complex subunit 12 [Source:ZFIN;Acc:ZDB-GENE-0  
mark1  
map2k1  
major vault protein [Source:ZFIN;Acc:ZDB-GENE-030826-33]  
lysine (K)-specific demethylase 5C [Source:ZFIN;Acc:ZDB-GEI  
low density lipoprotein receptor-related protein 1Bb [Sourc  
lonp2  
lin-9 DREAM MuvB core complex component [Source:ZFIN;/  
leucine-rich repeats and immunoglobulin-like domains 2 [Sc  
leucine-rich repeat, immunoglobulin-like and transmembrar

leucine rich repeat and fibronectin type III domain containin  
laminin, alpha 5 [Source:ZFIN;Acc:ZDB-GENE-030131-9823]  
laminin subunit alpha 2 [Source:HGNC Symbol;Acc:HGNC:64  
kmt2d  
kinesin family member 3A [Source:ZFIN;Acc:ZDB-GENE-0504  
kinesin family member 18A [Source:ZFIN;Acc:ZDB-GENE-040  
kinase non-catalytic C-lobe domain containing 1 [Source:HG  
kelch-like family member 24a [Source:ZFIN;Acc:ZDB-GENE-0  
kelch repeat and BTB (POZ) domain containing 8 [Source:ZFI  
kelch domain containing 3 [Source:ZFIN;Acc:ZDB-GENE-0404  
Josephin domain containing 2 [Source:ZFIN;Acc:ZDB-GENE-C  
IQ motif and Sec7 domain 1b [Source:ZFIN;Acc:ZDB-GENE-1:  
intracisternal A particle-promoted polypeptide [Source:HGNC  
inter-alpha-trypsin inhibitor heavy chain family, member 5 [S  
integrin, beta 4 [Source:ZFIN;Acc:ZDB-GENE-030131-7209]  
integrin, alpha 10 [Source:ZFIN;Acc:ZDB-GENE-100922-54]  
integrin, alpha 1 [Source:ZFIN;Acc:ZDB-GENE-091118-115]  
insulin induced gene 1 [Source:ZFIN;Acc:ZDB-GENE-030131-  
HMBS  
hemicentin 1 [Source:ZFIN;Acc:ZDB-GENE-041014-322]  
helicase with zinc finger 2, transcriptional coactivator [Sourc  
heat shock protein 12A [Source:ZFIN;Acc:ZDB-GENE-031001  
harbinger transposase derived 1 [Source:ZFIN;Acc:ZDB-GENE  
hadhab  
hacd1  
gucy2g  
growth regulation by estrogen in breast cancer 1 [Source:ZF  
growth arrest-specific 6 [Source:ZFIN;Acc:ZDB-GENE-030131  
grk1  
golgi reassembly stacking protein 2 [Source:HGNC Symbol;A  
glyoxylate reductase/hydroxypyruvate reductase a [Source:.  
glycogenin 1a [Source:ZFIN;Acc:ZDB-GENE-040426-2910]  
glutamic-oxaloacetic transaminase 2b, mitochondrial [Sourc  
glutamate receptor, metabotropic 3 [Source:ZFIN;Acc:ZDB-C  
glutamate receptor, metabotropic 2b [Source:ZFIN;Acc:ZDB-  
glutamate receptor, ionotropic, N-methyl D-aspartate 2A, b  
GGT7  
gba  
G protein-coupled receptor 89B [Source:HGNC Symbol;Acc:l  
G protein-coupled receptor 137B [Source:HGNC Symbol;Acc  
G protein signaling modulator 1b [Source:ZFIN;Acc:ZDB-GEN  
frizzled class receptor 3b [Source:ZFIN;Acc:ZDB-GENE-07012  
Fras1 related extracellular matrix 1b [Source:ZFIN;Acc:ZDB-C  
flt4  
fkbp7  
finTRIM family, member 83 [Source:ZFIN;Acc:ZDB-GENE-031  
fibronectin type III and SPRY domain containing 1 [Source:ZI  
fibrillin 1 [Source:HGNC Symbol;Acc:HGNC:3603]  
fer-1-like family member 6 [Source:ZFIN;Acc:ZDB-GENE-070  
fbp1a (1 of many)  
FAT atypical cadherin 3a [Source:ZFIN;Acc:ZDB-GENE-06092  
FAT atypical cadherin 3 [Source:HGNC Symbol;Acc:HGNC:23

FAT atypical cadherin 1a [Source:ZFIN;Acc:ZDB-GENE-05042  
FAD-dependent oxidoreductase domain containing 2 [Source:ZFIN;Acc:ZDB-GENE-030116-1  
F-box protein 46 [Source:HGNC Symbol;Acc:HGNC:25069]  
F-box and WD repeat domain containing 9 [Source:ZFIN;Acc:ZDB-GENE-030116-1  
extended synaptotagmin-like protein 1a [Source:ZFIN;Acc:ZDB-GENE-030116-1  
exocyst complex component 6 [Source:ZFIN;Acc:ZDB-GENE-030116-1  
estrogen receptor 2b [Source:ZFIN;Acc:ZDB-GENE-030116-1  
estrogen receptor 2b [Source:ZFIN;Acc:ZDB-GENE-030116-1  
estrogen receptor 2b [Source:ZFIN;Acc:ZDB-GENE-030116-1  
erap2  
EPHA4  
ENPP2  
endothelin converting enzyme-like 1 [Source:ZFIN;Acc:ZDB-GENE-040426-1556]  
EF-hand and coiled-coil domain containing 1 [Source:ZFIN;Acc:ZDB-GENE-040426-1556]  
ectonucleoside triphosphate diphosphohydrolase 4 [Source:ZFIN;Acc:ZDB-GENE-040426-1556]  
ectonucleoside triphosphate diphosphohydrolase 3 [Source:ZFIN;Acc:ZDB-GENE-040426-1556]  
echinoderm microtubule associated protein like 4 [Source:ZFIN;Acc:ZDB-GENE-040426-1556]  
dynamin 1-like [Source:ZFIN;Acc:ZDB-GENE-040426-1556]  
dpy-19 like 4 [Source:HGNC Symbol;Acc:HGNC:27829]  
dpp3  
Down syndrome cell adhesion molecule like 1 [Source:ZFIN;Acc:ZDB-GENE-040426-1556]  
double zinc ribbon and ankyrin repeat domains 1 [Source:ZFIN;Acc:ZDB-GENE-040426-1556]  
dopey family member 2 [Source:ZFIN;Acc:ZDB-GENE-040426-1556]  
dopey family member 1 [Source:ZFIN;Acc:ZDB-GENE-040426-1556]  
DnaJ (Hsp40) homolog, subfamily C, member 15 [Source:ZFIN;Acc:ZDB-GENE-040426-1556]  
DnaJ (Hsp40) homolog, subfamily B, member 12b [Source:ZFIN;Acc:ZDB-GENE-040426-1556]  
dnah11  
DNA (cytosine-5-)-methyltransferase 3 beta, duplicate a [Source:ZFIN;Acc:ZDB-GENE-040426-1556]  
discs, large (Drosophila) homolog-associated protein 1a [Source:ZFIN;Acc:ZDB-GENE-040426-1556]  
dedicator of cytokinesis 5 [Source:ZFIN;Acc:ZDB-GENE-040426-1556]  
DEAH (Asp-Glu-Ala-His) box polypeptide 33 [Source:ZFIN;Acc:ZDB-GENE-040426-1556]  
DEAH (Asp-Glu-Ala-His) box helicase 30 [Source:ZFIN;Acc:ZDB-GENE-040426-1556]  
DEAD (Asp-Glu-Ala-Asp) box polypeptide 52 [Source:ZFIN;Acc:ZDB-GENE-040426-1556]  
damage-specific DNA binding protein 1 [Source:ZFIN;Acc:ZDB-GENE-040426-1556]  
cytoplasmic FMR1 interacting protein 2 [Source:ZFIN;Acc:ZDB-GENE-040426-1556]  
cytohesin 2 [Source:HGNC Symbol;Acc:HGNC:9502]  
cytochrome P450, family 26, subfamily C, polypeptide 1 [Source:ZFIN;Acc:ZDB-GENE-040426-1556]  
cytochrome P450, family 2, subfamily N, polypeptide 13 [Source:ZFIN;Acc:ZDB-GENE-040426-1556]  
cytochrome P450, family 2, subfamily AE, polypeptide 1 [Source:ZFIN;Acc:ZDB-GENE-040426-1556]  
cysteine rich protein 2 [Source:HGNC Symbol;Acc:HGNC:236]  
cyclin T2a [Source:ZFIN;Acc:ZDB-GENE-030131-5779]  
cyb561  
CWF19-like 1, cell cycle control [Source:ZFIN;Acc:ZDB-GENE-030131-5779]  
cubilin (intrinsic factor-cobalamin receptor) [Source:ZFIN;Acc:ZDB-GENE-030131-5779]  
CREBBP  
CREBBP  
corticotropin releasing hormone receptor 1 [Source:ZFIN;Acc:ZDB-GENE-030131-5779]  
contactin associated protein 1 [Source:ZFIN;Acc:ZDB-GENE-030131-5779]  
contactin associated protein 1 [Source:ZFIN;Acc:ZDB-GENE-030131-5779]  
collagen, type V, alpha 3b [Source:ZFIN;Acc:ZDB-GENE-1107  
collagen, type V, alpha 3a [Source:ZFIN;Acc:ZDB-GENE-030131-5779]  
collagen, type IV, alpha 5 (Alport syndrome) [Source:ZFIN;Acc:ZDB-GENE-030131-5779]

collagen and calcium binding EGF domains 1 [Source:ZFIN;A  
coiled-coil and C2 domain containing 1A [Source:HGNC Sym  
CNKSR family member 3 [Source:HGNC Symbol;Acc:HGNC:2  
claudin c [Source:ZFIN;Acc:ZDB-GENE-010328-3]  
claudin 15a [Source:ZFIN;Acc:ZDB-GENE-040426-1305]  
claudin 1 [Source:ZFIN;Acc:ZDB-GENE-010328-11]  
chromodomain helicase DNA binding protein 6 [Source:ZFIN  
chromodomain helicase DNA binding protein 1-like [Source:  
chondroitin sulfate N-acetylgalactosaminyltransferase 1a [S  
cholinergic receptor, nicotinic, epsilon [Source:ZFIN;Acc:ZDE  
cholinergic receptor, nicotinic, alpha 1 (muscle) [Source:ZFI  
cholinergic receptor, muscarinic 5a [Source:ZFIN;Acc:ZDB-GI  
cerebral cavernous malformation 2-like [Source:ZFIN;Acc:ZC  
Cdk5 and Abl enzyme substrate 2a [Source:ZFIN;Acc:ZDB-GE  
cdk12  
CDC5 cell division cycle 5-like (S. pombe) [Source:ZFIN;Acc:Z  
CDC5 cell division cycle 5-like (S. pombe) [Source:ZFIN;Acc:Z  
catenin (cadherin-associated protein), delta 2a [Source:ZFIN  
carnitine palmitoyltransferase 1Cb [Source:ZFIN;Acc:ZDB-GE  
carboxypeptidase O [Source:ZFIN;Acc:ZDB-GENE-070619-6]  
carboxylesterase 3 [Source:ZFIN;Acc:ZDB-GENE-030131-956  
CAP-GLY domain containing linker protein 1a [Source:ZFIN;A  
camkk1a  
calponin 3, acidic b [Source:ZFIN;Acc:ZDB-GENE-050522-263  
calmodulin regulated spectrin-associated protein family, me  
calcineurin-like phosphoesterase domain containing 1 [Sour  
calcineurin-like phosphoesterase domain containing 1 [Sour  
cadherin, EGF LAG seven-pass G-type receptor 2 [Source:ZFI  
cadherin 7 [Source:HGNC Symbol;Acc:HGNC:1766]  
cadherin 4, type 1, R-cadherin (retinal) [Source:ZFIN;Acc:ZDI  
C1q and TNF related 4 [Source:ZFIN;Acc:ZDB-GENE-050417-  
BTB (POZ) domain containing 7 [Source:ZFIN;Acc:ZDB-GENE-  
bsk146  
bromodomain and WD repeat domain containing 3 [Source:  
bridging integrator 1b [Source:ZFIN;Acc:ZDB-GENE-030425-:  
bpgm  
bpgm  
bobby sox homolog (Drosophila) [Source:ZFIN;Acc:ZDB-GEN  
basic leucine zipper nuclear factor 1 [Source:HGNC Symbol;,  
autophagy/beclin-1 regulator 1b [Source:ZFIN;Acc:ZDB-GEN  
ATPase phospholipid transporting 8B4 [Source:ZFIN;Acc:ZDE  
ATPase copper transporting alpha [Source:ZFIN;Acc:ZDB-GE  
atp2a2a  
ATP11A (1 of many)  
ATP-binding cassette, sub-family C (CFTR/MRP), member 3 [  
ataxin 7 [Source:ZFIN;Acc:ZDB-GENE-110621-1]  
ataxin 10 [Source:ZFIN;Acc:ZDB-GENE-060503-180]  
aspartylglucosaminidase [Source:ZFIN;Acc:ZDB-GENE-04042  
asparaginase like 1 [Source:ZFIN;Acc:ZDB-GENE-050320-102  
arylsulfatase H [Source:ZFIN;Acc:ZDB-GENE-081104-120]  
aryl hydrocarbon receptor nuclear translocator-like 2 [Sourc  
armadillo repeat containing 1 [Source:ZFIN;Acc:ZDB-GENE-0

arih2

ArfGAP with SH3 domain, ankyrin repeat and PH domain 3 [Source:ZFIN;Acc:ZDB-GENE-050913-43]  
ArfGAP with RhoGAP domain, ankyrin repeat and PH domain  
aquarius intron-binding spliceosomal factor [Source:ZFIN;Acc:ZDB-GENE-050913-43]  
anoctamin 10a [Source:ZFIN;Acc:ZDB-GENE-050913-43]  
anoctamin 10a [Source:ZFIN;Acc:ZDB-GENE-050913-43]

aldh18a1

aldehyde dehydrogenase 9 family, member A1b [Source:ZFIN;Acc:ZDB-GENE-050913-43]  
ADP-ribosylation factor-like 8Bb [Source:ZFIN;Acc:ZDB-GENE-050913-43]  
ADP-ribosylation factor-like 8Ba [Source:ZFIN;Acc:ZDB-GENE-050913-43]  
adhesion G protein-coupled receptor V1 [Source:ZFIN;Acc:ZDB-GENE-050913-43]  
adenomatous polyposis coli 2 [Source:ZFIN;Acc:ZDB-GENE-050913-43]  
adaptor-related protein complex 2, mu 1 subunit, b [Source:ZFIN;Acc:ZDB-GENE-050913-43]  
adaptor-related protein complex 1, gamma 1 subunit [Source:ZFIN;Acc:ZDB-GENE-050913-43]  
adaptor protein, phosphotyrosine interaction, PH domain and SH3 domain containing 1  
ADAM metalloproteinase domain 32 [Source:HGNC Symbol;Acc:ZDB-GENE-050913-43]  
ADAM metalloproteinase domain 22 [Source:ZFIN;Acc:ZDB-GENE-050913-43]  
ADAM metalloproteinase domain 17 [Source:HGNC Symbol;Acc:ZDB-GENE-050913-43]  
aconitate decarboxylase 1 [Source:ZFIN;Acc:ZDB-GENE-081113-01]

acadsb

acadl

ABI family, member 3 (NESH) binding protein a [Source:ZFIN;Acc:ZDB-GENE-050913-43]  
abhydrolase domain containing 16A [Source:ZFIN;Acc:ZDB-GENE-050913-43]

abcb11a

abca4a

aatka

aak1a

A kinase (PRKA) anchor protein 11 [Source:ZFIN;Acc:ZDB-GENE-050913-43]  
3-hydroxyisobutyryl-CoA hydrolase [Source:ZFIN;Acc:ZDB-GENE-050913-43]

mars-02

ribosomal protein S3 [Source:ZFIN;Acc:ZDB-GENE-030131-8]

DnaJ (Hsp40) homolog, subfamily C, member 11a [Source:ZFIN;Acc:ZDB-GENE-050913-43]





atp2a2a  
atp2a2a  
abcb11a  
cp  
ENPP2  
erap2  
gcnt7  
loxhd1a  
mocs3  
PLCZ1  
prkaa1  
ppa1a  
tyr  
dystrophin related protein 2 [Source:ZFIN;Acc:ZDB-GENE-07

caspace recruitment domain family, member 14 [Source:ZFI  
transforming growth factor, beta 2, like [Source:ZFIN;Acc:ZC  
transforming growth factor, beta 2, like [Source:ZFIN;Acc:ZC  
collagen type XVII alpha 1 chain [Source:HGNC Symbol;Acc:HGNC:10000000846 [Source:ZFIN;Acc:ZDB-GENE-130530-849]  
DAN domain family, member 5 [Source:ZFIN;Acc:ZDB-GENE-130815-1]  
stromal interaction molecule 2a [Source:ZFIN;Acc:ZDB-GENE-130815-1]  
ADP-ribosylation factor-like 3, like 2 [Source:ZFIN;Acc:ZDB-GENE-130815-1]  
ATPase copper transporting alpha [Source:ZFIN;Acc:ZDB-GENE-130815-1]  
ATPase copper transporting alpha [Source:ZFIN;Acc:ZDB-GENE-130815-1]  
cytochrome P450 family 2 subfamily C member 8 [Source:HGNC Symbol;Acc:HGNC:10000000846 [Source:ZFIN;Acc:ZDB-GENE-130530-849]  
RAB30, member RAS oncogene family [Source:ZFIN;Acc:ZDB-GENE-130815-1]  
Fras1 related extracellular matrix protein 2b [Source:ZFIN;Acc:ZDB-GENE-130815-1]  
Fras1 related extracellular matrix protein 2b [Source:ZFIN;Acc:ZDB-GENE-130815-1]  
SLIT and NTRK-like family, member 4 [Source:ZFIN;Acc:ZDB-GENE-130815-1]  
fibrinogen-like 1 [Source:ZFIN;Acc:ZDB-GENE-130815-1]  
procollagen, type IX, alpha 2 [Source:ZFIN;Acc:ZDB-GENE-130815-1]  
si:ch211-229c8.4 [Source:ZFIN;Acc:ZDB-GENE-050419-129]  
si:dkey-166k12.1 [Source:ZFIN;Acc:ZDB-GENE-120215-78]  
si:dkey-166k12.1 [Source:ZFIN;Acc:ZDB-GENE-120215-78]  
si:ch73-125k17.2 [Source:ZFIN;Acc:ZDB-GENE-120215-164]  
collagen and calcium binding EGF domains 1 [Source:ZFIN;Acc:ZDB-GENE-120215-164]  
solute carrier family 2 (facilitated glucose transporter), member 1 [Source:ZFIN;Acc:ZDB-GENE-120215-164]  
uracil phosphoribosyltransferase (FUR1) homolog (S. cerevisiae) [Source:ZFIN;Acc:ZDB-GENE-120215-164]  
intermediate filament family orphan 1a [Source:ZFIN;Acc:ZDB-GENE-120215-164]  
G protein signaling modulator 1b [Source:ZFIN;Acc:ZDB-GENE-120215-164]

solute carrier family 46 (folate transporter), member 1 [Source:ZFIN;Acc:ZDB-GENE-05030-849]  
pyrimidinergic receptor P2Y6 [Source:HGNC Symbol;Acc:HGNC:10000000846 [Source:ZFIN;Acc:ZDB-GENE-130530-849]  
dopey family member 1 [Source:ZFIN;Acc:ZDB-GENE-05030-849]  
early B cell factor 1 [Source:HGNC Symbol;Acc:HGNC:3126]  
dendrocyte expressed seven transmembrane protein [Source:ZFIN;Acc:ZDB-GENE-010328-8]  
claudin h [Source:ZFIN;Acc:ZDB-GENE-010328-8]  
claudin h [Source:ZFIN;Acc:ZDB-GENE-010328-8]  
echinoderm microtubule associated protein like 4 [Source:HGNC Symbol;Acc:HGNC:10000000846 [Source:ZFIN;Acc:ZDB-GENE-130530-849]  
pantothenate kinase 1a [Source:ZFIN;Acc:ZDB-GENE-040426-849]  
pantothenate kinase 1a [Source:ZFIN;Acc:ZDB-GENE-040426-849]  
solute carrier family 22 (organic anion transporter), member 1 [Source:ZFIN;Acc:ZDB-GENE-040426-849]  
calcineurin-like phosphoesterase domain containing 1 [Source:ZFIN;Acc:ZDB-GENE-040426-849]  
neuronal E3 ubiquitin protein ligase 2 [Source:ZFIN;Acc:ZDB-GENE-040426-849]  
solute carrier family 2 member 4 [Source:HGNC Symbol;Acc:HGNC:10000000846 [Source:ZFIN;Acc:ZDB-GENE-130530-849]  
GDNF family receptor alpha 3 [Source:ZFIN;Acc:ZDB-GENE-040426-849]  
leucine-rich repeat, immunoglobulin-like and transmembrane protein [Source:ZFIN;Acc:ZDB-GENE-040426-849]  
si:ch211-284e13.4 [Source:ZFIN;Acc:ZDB-GENE-060526-161]  
meningioma expressed antigen 5 (hyaluronidase) [Source:ZFIN;Acc:ZDB-GENE-060526-161]  
meningioma expressed antigen 5 (hyaluronidase) [Source:ZFIN;Acc:ZDB-GENE-060526-161]

APC membrane recruitment protein 2 [Source:ZFIN;Acc:ZDB  
claudin 15a [Source:ZFIN;Acc:ZDB-GENE-040426-1305]  
si:ch211-217a12.1 [Source:ZFIN;Acc:ZDB-GENE-121214-95]  
5-methyltetrahydrofolate-homocysteine methyltransferase  
XK, Kell blood group complex subunit-related family, memb

endothelin receptor type A [Source:HGNC Symbol;Acc:HGNC  
neuroigin 2a [Source:ZFIN;Acc:ZDB-GENE-090918-2]  
short chain dehydrogenase/reductase family 16C, member 1  
ectonucleoside triphosphate diphosphohydrolase 3 [Source  
Oryzias latipes RAD21 cohesin complex component (rad21),  
carboxypeptidase X, M14 family member 2 [Source:HGNC S  
transient receptor potential cation channel, subfamily C, me  
si:ch73-63e15.2 [Source:ZFIN;Acc:ZDB-GENE-091204-463]  
myelin expression factor 2 [Source:ZFIN;Acc:ZDB-GENE-051:  
ATPase phospholipid transporting 8B2 [Source:HGNC Symbc  
basic leucine zipper nuclear factor 1 [Source:HGNC Symbol;,  
NTPase, KAP family P-loop domain containing 1 [Source:ZFIN  
adaptor-related protein complex 1, gamma 1 subunit [Sourc  
myocardial zonula adherens protein [Source:ZFIN;Acc:ZDB-C  
kinesin family member 3A [Source:ZFIN;Acc:ZDB-GENE-0504  
feline leukemia virus subgroup C cellular receptor family, m  
Oryzias latipes 50 kD glycoprotein (rh50), mRNA. [Source:Re  
opsin 8, group member b [Source:ZFIN;Acc:ZDB-GENE-07071  
T-box 18 [Source:ZFIN;Acc:ZDB-GENE-020529-2]

cadherin, EGF LAG seven-pass G-type receptor 2 [Source:ZFI  
bassoon (presynaptic cytomatrix protein) b [Source:ZFIN;Acc:  
Fras1 related extracellular matrix 1b [Source:ZFIN;Acc:ZDB-C  
fibrillin 2b [Source:ZFIN;Acc:ZDB-GENE-090112-3]  
R3H domain containing 2 [Source:HGNC Symbol;Acc:HGNC:  
solute carrier family 5 (iodide transporter), member 8-like (S  
SWI/SNF related, matrix associated, actin dependent regula  
family with sequence similarity 43, member A [Source:ZFIN;  
EGF domain-specific O-linked N-acetylglucosamine (GlcNAc)  
si:ch73-61d6.3 [Source:ZFIN;Acc:ZDB-GENE-091204-109]  
cysteine rich protein 2 [Source:HGNC Symbol;Acc:HGNC:236  
kazrin, periplakin interacting protein [Source:HGNC Symbol;  
calcium channel, voltage-dependent, L type, alpha 1S subun  
oxysterol binding protein-like 2b [Source:ZFIN;Acc:ZDB-GEN  
SMAD family member 3b [Source:ZFIN;Acc:ZDB-GENE-0301:  
calcium channel, voltage-dependent, L type, alpha 1S subun  
calcium channel, voltage-dependent, L type, alpha 1S subun  
transient receptor potential cation channel, subfamily M, m  
transient receptor potential cation channel, subfamily M, m  
transient receptor potential cation channel, subfamily M, m

si:dkeyp-59c12.1 [Source:ZFIN;Acc:ZDB-GENE-050419-167]  
solute carrier family 6 (neurotransmitter transporter), mem  
cholinergic receptor, muscarinic 2b [Source:ZFIN;Acc:ZDB-G  
cholinergic receptor, muscarinic 2b [Source:ZFIN;Acc:ZDB-G

si:ch211-214j8.1 [Source:ZFIN;Acc:ZDB-GENE-060526-100]  
dedicator of cytokinesis 8 [Source:ZFIN;Acc:ZDB-GENE-0605  
apoptosis-inducing factor, mitochondrion-associated, 3 [Sou  
transient receptor potential cation channel, subfamily M, m  
transient receptor potential cation channel, subfamily M, m  
spinster homolog 3 (Drosophila) [Source:ZFIN;Acc:ZDB-GENI  
spinster homolog 3 (Drosophila) [Source:ZFIN;Acc:ZDB-GENI  
solute carrier family 2 (facilitated glucose transporter), mem  
transmembrane channel-like 8 [Source:ZFIN;Acc:ZDB-GENE-  
G protein-coupled receptor 137B [Source:HGNC Symbol;Acc  
uroporphyrinogen decarboxylase [Source:ZFIN;Acc:ZDB-GEN  
kelch domain containing 3 [Source:ZFIN;Acc:ZDB-GENE-0404  
kelch domain containing 3 [Source:ZFIN;Acc:ZDB-GENE-0404  
kelch domain containing 3 [Source:ZFIN;Acc:ZDB-GENE-0404  
SH3-domain GRB2-like endophilin B2b [Source:ZFIN;Acc:ZDB-  
prostaglandin E receptor 1a (subtype EP1) [Source:ZFIN;Acc  
5-hydroxytryptamine (serotonin) receptor 3A [Source:ZFIN;/  
SH3-domain binding protein 2 [Source:ZFIN;Acc:ZDB-GENE-(  
heart and neural crest derivatives expressed 1 [Source:HGNC  
glycogenin 1a [Source:ZFIN;Acc:ZDB-GENE-040426-2910]  
glycogenin 1a [Source:ZFIN;Acc:ZDB-GENE-040426-2910]  
cadherin 7 [Source:HGNC Symbol;Acc:HGNC:1766]  
uroporphyrinogen decarboxylase [Source:ZFIN;Acc:ZDB-GEN  
abhydrolase domain containing 16A [Source:ZFIN;Acc:ZDB-G  
otolith matrix protein [Source:ZFIN;Acc:ZDB-GENE-040709-1  
adaptor-related protein complex 2, mu 1 subunit, b [Source  
mesenchyme homeobox 1 [Source:ZFIN;Acc:ZDB-GENE-0404  
chromatin accessibility complex 1 [Source:HGNC Symbol;Acc  
protein phosphatase 2 regulatory subunit B'gamma [Source  
tensin 1b [Source:ZFIN;Acc:ZDB-GENE-030131-6933]  
glycoprotein hormones, alpha polypeptide [Source:ZFIN;Acc  
3-hydroxyisobutyryl-CoA hydrolase [Source:ZFIN;Acc:ZDB-G  
bridging integrator 1a [Source:ZFIN;Acc:ZDB-GENE-070912-1  
arylsulfatase H [Source:ZFIN;Acc:ZDB-GENE-081104-120]  
solute carrier family 35, member F4 [Source:ZFIN;Acc:ZDB-G

potassium channel, subfamily K, member 3a [Source:ZFIN;A  
lin-9 DREAM MuvB core complex component [Source:ZFIN;A  
spalt-like transcription factor 1a [Source:ZFIN;Acc:ZDB-GENE-070228-6]  
utrophin [Source:ZFIN;Acc:ZDB-GENE-070228-6]  
solute carrier family 38, member 11 [Source:ZFIN;Acc:ZDB-GENE-050417-174]  
connexin 35.4 [Source:ZFIN;Acc:ZDB-GENE-050417-174]  
G protein-coupled receptor 89B [Source:HGNC Symbol;Acc:ZDB-GENE-1174-174]  
IQ motif and Sec7 domain 1b [Source:ZFIN;Acc:ZDB-GENE-1174-174]  
IQ motif and Sec7 domain 1b [Source:ZFIN;Acc:ZDB-GENE-1174-174]  
TGF-beta activated kinase 1/MAP3K7 binding protein 2 [Source:ZFIN;Acc:ZDB-GENE-1174-174]  
myosin, heavy chain 6, cardiac muscle, alpha [Source:ZFIN;Acc:ZDB-GENE-1174-174]  
myosin binding protein C, slow type [Source:ZFIN;Acc:ZDB-GENE-1174-174]  
SLIT-ROBO Rho GTPase activating protein 1b [Source:ZFIN;Acc:ZDB-GENE-1174-174]  
leucine rich repeat and fibronectin type III domain containing protein 37, member RAS oncogene family [Source:HGNC Symbol;Acc:ZDB-GENE-1174-174]  
solute carrier family 16, member 7 (monocarboxylic acid transporter) [Source:ZFIN;Acc:ZDB-GENE-1174-174]  
RAP1 GTPase activating protein [Source:ZFIN;Acc:ZDB-GENE-1174-174]  
tight junction protein 3 [Source:ZFIN;Acc:ZDB-GENE-030828-6]  
XK, Kell blood group complex subunit-related family, member 1 [Source:ZFIN;Acc:ZDB-GENE-1174-174]  
AHA1, activator of heat shock protein ATPase homolog 1b [Source:ZFIN;Acc:ZDB-GENE-1174-174]

dedicator of cytokinesis 5 [Source:ZFIN;Acc:ZDB-GENE-0801-6]  
SMAD family member 2 [Source:ZFIN;Acc:ZDB-GENE-99060-6]

carnitine palmitoyltransferase 1Cb [Source:ZFIN;Acc:ZDB-GENE-040718-68]  
carnitine palmitoyltransferase 1Cb [Source:ZFIN;Acc:ZDB-GENE-040718-68]  
muscle-specific beta 1 integrin binding protein [Source:ZFIN;Acc:ZDB-GENE-040718-68]  
peripherin 2a (retinal degeneration, slow) [Source:ZFIN;Acc:ZDB-GENE-040718-68]  
regucalcin [Source:ZFIN;Acc:ZDB-GENE-040718-68]  
tRNA aspartic acid methyltransferase 1 [Source:ZFIN;Acc:ZDB-GENE-031118-76]  
aconitase 1, soluble [Source:ZFIN;Acc:ZDB-GENE-031118-76]  
sodium voltage-gated channel alpha subunit 4 [Source:HGNC Symbol;Acc:ZDB-GENE-1174-174]

| Gene description                                                           | Expressed in ovary |
|----------------------------------------------------------------------------|--------------------|
| siae) [Source:ZFIN;Acc:ZDB-GENE-040426-2411]                               | yes                |
| N;Acc:ZDB-GENE-061103-619]                                                 | yes                |
| );Acc:HGNC:30232]                                                          | yes                |
|                                                                            | yes                |
| -2572]                                                                     | yes                |
| B-GENE-040801-185]                                                         | yes                |
| putative pyruvate dehydrogenase phosphatase isoenzyme 2 [Source:ZFIN       | yes                |
| E-030131-6138]                                                             | yes                |
| 5'-nucleotidase, cytosolic IIIB [Source:HGNC Symbol;Acc:HGNC:28300]        | yes                |
| inositol-tetrakisphosphate 1-kinase b [Source:ZFIN;Acc:ZDB-GENE-131126     | yes                |
| ZDB-GENE-040426-1975]                                                      | yes                |
| ZDB-GENE-040426-1975]                                                      | yes                |
| dual specificity phosphatase 1 [Source:ZFIN;Acc:ZDB-GENE-040426-2018]      | yes                |
| DB-GENE-070628-3]                                                          | yes                |
|                                                                            | yes                |
| ENE-030131-6514]                                                           | yes                |
| 0618-2]                                                                    | yes                |
| protein kinase, AMP-activated, alpha 1 catalytic subunit [Source:ZFIN;Acc: | yes                |
|                                                                            | yes                |
| on 3 (stat3), mRNA. [Source:RefSeq mRNA;Acc:NM_001104838]                  | yes                |
| ]                                                                          | yes                |
| E-050522-67]                                                               | yes                |
| [Source:ZFIN;Acc:ZDB-GENE-081104-155]                                      | yes                |
| ce:ZFIN;Acc:ZDB-GENE-040614-3]                                             | yes                |
| FK506 binding protein 1Ab [Source:ZFIN;Acc:ZDB-GENE-040927-9]              | yes                |
| FK506 binding protein 1Aa [Source:ZFIN;Acc:ZDB-GENE-030131-7275]           | yes                |
| DB-GENE-030131-1565]                                                       | yes                |
| 408-2]                                                                     | yes                |
| ce:HGNC Symbol;Acc:HGNC:1490]                                              | yes                |
| Source:ZFIN;Acc:ZDB-GENE-030131-664]                                       | yes                |
| adenylate cyclase 7 [Source:ZFIN;Acc:ZDB-GENE-040713-1]                    | yes                |
| FIN;Acc:ZDB-GENE-060503-816]                                               | yes                |
| ]                                                                          | yes                |
|                                                                            | yes                |
| -49]                                                                       | yes                |
| -9613]                                                                     | yes                |
| 4-18]                                                                      | yes                |
| )-3]                                                                       | yes                |
| L-7577]                                                                    | yes                |
| ENE-050419-13]                                                             | yes                |
| bol;Acc:HGNC:23836]                                                        | yes                |
| rce:ZFIN;Acc:ZDB-GENE-000208-4]                                            | yes                |
|                                                                            | yes                |
|                                                                            | yes                |
|                                                                            | yes                |
| FIN;Acc:ZDB-GENE-040426-948]                                               | yes                |
| [118-93]                                                                   | yes                |
| ymbol;Acc:HGNC:12762]                                                      | yes                |
| WNK lysine deficient protein kinase 4 [Source:HGNC Symbol;Acc:HGNC:14      | yes                |
| ource:ZFIN;Acc:ZDB-GENE-081104-419]                                        | yes                |

|                                                                        |     |
|------------------------------------------------------------------------|-----|
| ]-3]                                                                   | yes |
| :ZDB-GENE-070705-153]                                                  | yes |
| :ZDB-GENE-041024-4]                                                    | yes |
| \acc:ZDB-GENE-100302-1]                                                | yes |
| -GENE-040426-803]                                                      | yes |
| l31-5408]                                                              | yes |
|                                                                        | yes |
| ubiquitin specific peptidase 16 [Source:ZFIN;Acc:ZDB-GENE-030131-4153] | yes |
| VE-000208-18]                                                          | yes |
| 40426-907]                                                             | yes |
| N;Acc:ZDB-GENE-050517-21]                                              | yes |
| urce:ZFIN;Acc:ZDB-GENE-030131-5971]                                    | yes |
| 803-1]                                                                 | yes |
| 77]                                                                    | yes |
| \;Acc:ZDB-GENE-050320-73]                                              | yes |
| ZFIN;Acc:ZDB-GENE-040426-953]                                          | yes |
| DB-GENE-041008-138]                                                    | yes |
| DB-GENE-041008-138]                                                    | yes |
| 40724-145]                                                             | yes |
| thyroid hormone receptor interactor 12 [Source:ZFIN;Acc:ZDB-GENE-0411  | yes |
| NE-030131-8404]                                                        | yes |
| thyrotropin releasing hormone degrading enzyme, tandem duplicate 2 [Sc | yes |
|                                                                        | yes |
| ZDB-GENE-040625-140]                                                   | yes |
| ember 3 [Source:ZFIN;Acc:ZDB-GENE-060531-95]                           | yes |
| ember 1b [Source:ZFIN;Acc:ZDB-GENE-070424-31]                          | yes |
| ember 1 [Source:ZFIN;Acc:ZDB-GENE-070830-1]                            | yes |
| ember 1b [Source:ZFIN;Acc:ZDB-GENE-050106-1]                           | yes |
|                                                                        | yes |
| DB-GENE-130425-3]                                                      | yes |
| ]-9012]                                                                | yes |
| !5-1]                                                                  | yes |
| 30131-9745]                                                            | yes |
|                                                                        | yes |
| \acc:HGNC:29944]                                                       | yes |
| IE-030131-2064]                                                        | yes |
| sociated factor [Source:ZFIN;Acc:ZDB-GENE-030131-5576]                 | yes |
|                                                                        | yes |
| spleen tyrosine kinase [Source:ZFIN;Acc:ZDB-GENE-040702-3]             | yes |
| tor of chromatin, subfamily d, member 1 [Source:ZFIN;Acc:ZDB-GENE-030  | yes |
| B-GENE-100913-1]                                                       | yes |
| IN;Acc:ZDB-GENE-050417-228]                                            | yes |
| ::ZDB-GENE-030131-105]                                                 | yes |
| !6-1198]                                                               | yes |
| Acc:ZDB-GENE-031106-3]                                                 | yes |
| 3-GENE-080725-1]                                                       | yes |
| !b [Source:ZFIN;Acc:ZDB-GENE-121226-2]                                 | yes |
| E-060531-7]                                                            | yes |
| :26992]                                                                | yes |
| GENE-060929-204]                                                       | yes |
| !906-1]                                                                | yes |
| E-020228-2]                                                            | yes |



|                                                                            |     |
|----------------------------------------------------------------------------|-----|
|                                                                            | yes |
| 1 [Source:ZFIN;Acc:ZDB-GENE-041210-50]                                     | yes |
| ystem), member 3a [Source:ZFIN;Acc:ZDB-GENE-041114-206]                    | yes |
| ber 11b [Source:ZFIN;Acc:ZDB-GENE-121116-2]                                | yes |
| :c:HGNC:13811]                                                             | yes |
| ENE-050417-122]                                                            | yes |
| ENE-041210-186]                                                            | yes |
| e:ZFIN;Acc:ZDB-GENE-041014-347]                                            | yes |
| [Source:ZFIN;Acc:ZDB-GENE-050706-104]                                      | yes |
| ::HGNC:11009]                                                              | yes |
| number 2 [Source:ZFIN;Acc:ZDB-GENE-030131-1213]                            | yes |
| insporter 2) [Source:ZFIN;Acc:ZDB-GENE-051113-248]                         | yes |
| v;Acc:ZDB-GENE-040718-457]                                                 | yes |
| 28-4]                                                                      | yes |
| 3-7]                                                                       | yes |
| 0306-4]                                                                    | yes |
| ZDB-GENE-040426-2801]                                                      | yes |
| l;Acc:ZDB-GENE-050420-109]                                                 | yes |
| iN;Acc:ZDB-GENE-030616-264]                                                | yes |
|                                                                            | yes |
|                                                                            | yes |
|                                                                            | yes |
| si:dkey-160o24.3 [Source:ZFIN;Acc:ZDB-GENE-140106-224]                     | yes |
| nicotinamide nucleotide adenylyltransferase 3 [Source:HGNC Symbol;Acc:     | yes |
|                                                                            | yes |
|                                                                            | yes |
| 6]                                                                         | yes |
|                                                                            | yes |
|                                                                            | yes |
|                                                                            | yes |
| 7]                                                                         | yes |
| 5a [Source:ZFIN;Acc:ZDB-GENE-040426-2049]                                  | yes |
| 5a [Source:ZFIN;Acc:ZDB-GENE-040426-2049]                                  | yes |
| selenophosphate synthetase 1 [Source:ZFIN;Acc:ZDB-GENE-030131-3670]        | yes |
| ric domain, (semaphorin) 6Ba [Source:ZFIN;Acc:ZDB-GENE-131024-1]           | yes |
| NE-040426-2784]                                                            | yes |
| 35]                                                                        | yes |
| E-061226-3]                                                                | yes |
| RNA guanylyltransferase and 5'-phosphatase [Source:ZFIN;Acc:ZDB-GENE-      | yes |
| 10]                                                                        | yes |
| -2]                                                                        | yes |
| 788]                                                                       | yes |
| ENE-120516-2]                                                              | yes |
| ENE-120516-2]                                                              | yes |
| ENE-080220-26]                                                             | yes |
| 426-2595]                                                                  | yes |
| REV3-like, polymerase (DNA directed), zeta, catalytic subunit [Source:ZFIN | yes |
| 526-436]                                                                   | yes |
| l]                                                                         | yes |
|                                                                            | yes |
|                                                                            | yes |
| nbol;Acc:HGNC:13232]                                                       | yes |

|                                                                          |     |
|--------------------------------------------------------------------------|-----|
| ENE-061013-179]                                                          | yes |
| Source:ZFIN;Acc:ZDB-GENE-130530-945]                                     | yes |
| Source:ZFIN;Acc:ZDB-GENE-131122-56]                                      | yes |
| );Acc:HGNC:9776]                                                         | yes |
| }-GENE-040718-250]                                                       | yes |
| ZDB-GENE-050706-113]                                                     | yes |
| }-GENE-030826-20]                                                        | yes |
| }-GENE-030826-20]                                                        | yes |
| }-GENE-040718-304]                                                       | yes |
| ZDB-GENE-030131-6682]                                                    | yes |
| ZDB-GENE-030131-6682]                                                    | yes |
| 29167]                                                                   | yes |
| INC:8543]                                                                | yes |
| prostaglandin reductase 2 [Source:ZFIN;Acc:ZDB-GENE-050506-71]           | yes |
| pre-mRNA processing factor 4Bb [Source:ZFIN;Acc:ZDB-GENE-040426-279      | yes |
| :HGNC Symbol;Acc:HGNC:9311]                                              | yes |
| 030131-3595]                                                             | yes |
| e:ZFIN;Acc:ZDB-GENE-030131-9008]                                         | yes |
| 0415-216]                                                                | yes |
| 0415-216]                                                                | yes |
| GENE-030131-8730]                                                        | yes |
| }-397]                                                                   | yes |
| 3-1]                                                                     | yes |
| 3-1]                                                                     | yes |
| peptidylprolyl isomerase Fb [Source:ZFIN;Acc:ZDB-GENE-051030-126]        | yes |
| peptidylprolyl isomerase C [Source:ZFIN;Acc:ZDB-GENE-170217-1]           | yes |
| number 7 [Source:ZFIN;Acc:ZDB-GENE-120214-39]                            | yes |
| Source:ZFIN;Acc:ZDB-GENE-040718-14]                                      | yes |
|                                                                          | yes |
| polymerase (DNA directed), theta [Source:ZFIN;Acc:ZDB-GENE-040724-23     | yes |
|                                                                          | yes |
| polycystic kidney disease 1 like 2a [Source:ZFIN;Acc:ZDB-GENE-050208-89  | yes |
|                                                                          | yes |
| ) [Source:ZFIN;Acc:ZDB-GENE-040426-2079]                                 | yes |
| GENE-030826-13]                                                          | yes |
| phosphatase, orphan 1 [Source:ZFIN;Acc:ZDB-GENE-040801-198]              | yes |
| change factor 2 [Source:ZFIN;Acc:ZDB-GENE-091113-37]                     | yes |
| Source:ZFIN;Acc:ZDB-GENE-080204-94]                                      | yes |
| Source:ZFIN;Acc:ZDB-GENE-040426-1216]                                    | yes |
| Source:ZFIN;Acc:ZDB-GENE-030103-2]                                       | yes |
| }-2]                                                                     | yes |
| GENE-071227-2]                                                           | yes |
| GENE-071227-2]                                                           | yes |
| 6-908]                                                                   | yes |
| protein-L-isoaspartate (D-aspartate) O-methyltransferase [Source:ZFIN;Ac | yes |
| 5-2846]                                                                  | yes |
| GENE-081104-353]                                                         | yes |
| -070912-206]                                                             | yes |
| IE-050208-657]                                                           | yes |
|                                                                          | yes |
| mRNA. [Source:RefSeq mRNA;Acc:NM_001104691]                              | yes |
| e:RefSeq mRNA;Acc:NM_001104777]                                          | yes |

|                                                                                   |     |
|-----------------------------------------------------------------------------------|-----|
| rg2), mRNA. [Source:RefSeq mRNA;Acc:NM_001163092]                                 | yes |
| -GENE-030131-6247]                                                                | yes |
| -GENE-061013-682]                                                                 | yes |
|                                                                                   | yes |
| 081029-9]                                                                         | yes |
|                                                                                   | yes |
|                                                                                   | yes |
| 051107-8]                                                                         | yes |
| GNC:7670]                                                                         | yes |
| neurotrophic tyrosine kinase, receptor, type 2a [Source:ZFIN;Acc:ZDB-GENE-060524] | yes |
| aminopeptidase puromycin sensitive [Source:ZFIN;Acc:ZDB-GENE-060524]              | yes |
| N-myristoyltransferase 2 [Source:ZFIN;Acc:ZDB-GENE-030131-717]                    | yes |
| 8-2]                                                                              | yes |
| ENE-031030-13]                                                                    | yes |
| iENE-041014-367]                                                                  | yes |
|                                                                                   | yes |
| IB-GENE-100318-4]                                                                 | yes |
| Oryzias latipes sialidase 4 (neu4), mRNA. [Source:RefSeq mRNA;Acc:NM_030131-2767] | yes |
| ENE-030131-2767]                                                                  | yes |
| 1-5538]                                                                           | yes |
| 31-4426]                                                                          | yes |
| nicotinate phosphoribosyltransferase [Source:ZFIN;Acc:ZDB-GENE-040426]            | yes |
| GENE-041112-1]                                                                    | yes |
| HGNC:7632]                                                                        | yes |
| GENE-030131-5870]                                                                 | yes |
|                                                                                   | yes |
| .111-150]                                                                         | yes |
| GENE-041111-91]                                                                   | yes |
| myosin IIIA [Source:ZFIN;Acc:ZDB-GENE-041026-4]                                   | yes |
| 120-114]                                                                          | yes |
| 120-114]                                                                          | yes |
| ;Acc:ZDB-GENE-030404-1]                                                           | yes |
| 10730-1]                                                                          | yes |
| methionine sulfoxide reductase A [Source:ZFIN;Acc:ZDB-GENE-041014-34]             | yes |
| bol;Acc:HGNC:7201]                                                                | yes |
| t [Source:ZFIN;Acc:ZDB-GENE-120316-2]                                             | yes |
|                                                                                   | yes |
| ource:ZFIN;Acc:ZDB-GENE-070705-326]                                               | yes |
| HGNC:26945]                                                                       | yes |
| FIN;Acc:ZDB-GENE-030131-3208]                                                     | yes |
| ain containing 1b [Source:ZFIN;Acc:ZDB-GENE-030131-5110]                          | yes |
| Acc:ZDB-GENE-100729-5]                                                            | yes |
| 160125-1]                                                                         | yes |
| MAP/microtubule affinity-regulating kinase 1 [Source:ZFIN;Acc:ZDB-GENE-041014-34] | yes |
| mitogen-activated protein kinase kinase 1 [Source:ZFIN;Acc:ZDB-GENE-041014-34]    | yes |
| ]                                                                                 | yes |
| NE-060810-94]                                                                     | yes |
| e:ZFIN;Acc:ZDB-GENE-070912-401]                                                   | yes |
| lon peptidase 2, peroxisomal [Source:ZFIN;Acc:ZDB-GENE-041212-1]                  | yes |
| Acc:ZDB-GENE-030131-1747]                                                         | yes |
| ource:ZFIN;Acc:ZDB-GENE-041111-75]                                                | yes |
| ne domains 2 [Source:ZFIN;Acc:ZDB-GENE-050522-160]                                | yes |

|                                                                           |     |
|---------------------------------------------------------------------------|-----|
| g 2 [Source:HGNC Symbol;Acc:HGNC:21226]                                   | yes |
|                                                                           | yes |
| 482]                                                                      | yes |
| lysine (K)-specific methyltransferase 2D [Source:ZFIN;Acc:ZDB-GENE-0602   | yes |
| 417-71]                                                                   | yes |
| 0426-862]                                                                 | yes |
| iNC Symbol;Acc:HGNC:29374]                                                | yes |
| 061013-572]                                                               | yes |
| IN;Acc:ZDB-GENE-030114-8]                                                 | yes |
| 426-2426]                                                                 | yes |
| 040426-850]                                                               | yes |
| 20813-1]                                                                  | yes |
| NC Symbol;Acc:HGNC:6108]                                                  | yes |
| [Source:ZFIN;Acc:ZDB-GENE-041210-193]                                     | yes |
|                                                                           | yes |
|                                                                           | yes |
|                                                                           | yes |
|                                                                           | yes |
| -6121]                                                                    | yes |
| hydroxymethylbilane synthase [Source:HGNC Symbol;Acc:HGNC:4982]           | yes |
|                                                                           | yes |
| ce:ZFIN;Acc:ZDB-GENE-120920-1]                                            | yes |
| -1]                                                                       | yes |
| E-040608-1]                                                               | yes |
| hydroxyacyl-CoA dehydrogenase trifunctional multienzyme complex subu      | yes |
| 3-hydroxyacyl-CoA dehydratase 1 [Source:ZFIN;Acc:ZDB-GENE-170413-2]       | yes |
| guanylate cyclase 2g [Source:ZFIN;Acc:ZDB-GENE-130531-70]                 | yes |
| IN;Acc:ZDB-GENE-070112-332]                                               | yes |
| 1-7773]                                                                   | yes |
| Oryzias latipes G protein-coupled receptor kinase 1 (grk1), mRNA. [Source | yes |
| cc:HGNC:17500]                                                            | yes |
| ZFIN;Acc:ZDB-GENE-040724-230]                                             | yes |
|                                                                           | yes |
| ce:ZFIN;Acc:ZDB-GENE-030131-7917]                                         | yes |
| 3ENE-061009-13]                                                           | yes |
| -GENE-060201-5]                                                           | yes |
| [Source:ZFIN;Acc:ZDB-GENE-070424-223]                                     | yes |
| gamma-glutamyltransferase 7 [Source:HGNC Symbol;Acc:HGNC:4259]            | yes |
| glucosidase, beta, acid [Source:ZFIN;Acc:ZDB-GENE-100922-270]             | yes |
| HGNC:13840]                                                               | yes |
| cc:HGNC:11862]                                                            | yes |
| VE-110203-5]                                                              | yes |
| 22-1]                                                                     | yes |
| GENE-050208-783]                                                          | yes |
| fms-related tyrosine kinase 4 [Source:ZFIN;Acc:ZDB-GENE-980526-326]       | yes |
| FK506 binding protein 7 [Source:ZFIN;Acc:ZDB-GENE-030616-182]             | yes |
| 1002-11]                                                                  | yes |
| FIN;Acc:ZDB-GENE-060503-218]                                              | yes |
|                                                                           | yes |
| 912-312]                                                                  | yes |
| fructose-1,6-bisphosphatase 1a [Source:ZFIN;Acc:ZDB-GENE-030131-7171      | yes |
| 9-1254]                                                                   | yes |
| 3112]                                                                     | yes |

|                                                                      |     |
|----------------------------------------------------------------------|-----|
| !5-1]                                                                | yes |
| :e:ZFIN;Acc:ZDB-GENE-060929-1026]                                    | yes |
|                                                                      | yes |
| ::ZDB-GENE-091204-198]                                               | yes |
| DB-GENE-090311-55]                                                   | yes |
| 040426-2511]                                                         | yes |
| .]                                                                   | yes |
| .]                                                                   | yes |
| .]                                                                   | yes |
| endoplasmic reticulum aminopeptidase 2 [Source:ZFIN;Acc:ZDB-GENE-08( | yes |
| EPH receptor A4 [Source:HGNC Symbol;Acc:HGNC:3388]                   | yes |
| ectonucleotide pyrophosphatase/phosphodiesterase 2 [Source:HGNC Syn  | yes |
| GENE-130530-692]                                                     | yes |
| .cc:ZDB-GENE-120813-3]                                               | yes |
| :ZFIN;Acc:ZDB-GENE-040718-116]                                       | yes |
| :ZFIN;Acc:ZDB-GENE-030131-6186]                                      | yes |
| HGNC Symbol;Acc:HGNC:1316]                                           | yes |
|                                                                      | yes |
|                                                                      | yes |
| dipeptidyl-peptidase 3 [Source:ZFIN;Acc:ZDB-GENE-030131-1247]        | yes |
| Acc:ZDB-GENE-110601-1]                                               | yes |
| :FIN;Acc:ZDB-GENE-051113-296]                                        | yes |
| 6-1195]                                                              | yes |
| 9-65]                                                                | yes |
| IN;Acc:ZDB-GENE-040801-216]                                          | yes |
| FIN;Acc:ZDB-GENE-070410-128]                                         | yes |
| dynein, axonemal, heavy chain 11 [Source:ZFIN;Acc:ZDB-GENE-100922-8] | yes |
| urce:ZFIN;Acc:ZDB-GENE-050314-4]                                     | yes |
| urce:ZFIN;Acc:ZDB-GENE-030616-580]                                   | yes |
| .08-4]                                                               | yes |
| c:ZDB-GENE-131127-77]                                                | yes |
| DB-GENE-130530-833]                                                  | yes |
| cc:ZDB-GENE-060623-1]                                                | yes |
| DB-GENE-040426-1272]                                                 | yes |
| DB-GENE-080724-2]                                                    | yes |
|                                                                      | yes |
| urce:ZFIN;Acc:ZDB-GENE-050714-2]                                     | yes |
| urce:ZFIN;Acc:ZDB-GENE-041001-158]                                   | yes |
| urce:ZFIN;Acc:ZDB-GENE-090312-107]                                   | yes |
| 51]                                                                  | yes |
|                                                                      | yes |
| cytochrome b561 [Source:ZFIN;Acc:ZDB-GENE-070713-3]                  | yes |
| -031204-5]                                                           | yes |
| :c:ZDB-GENE-060228-6]                                                | yes |
| CREB binding protein [Source:HGNC Symbol;Acc:HGNC:2348]              | yes |
| CREB binding protein [Source:HGNC Symbol;Acc:HGNC:2348]              | yes |
| :c:ZDB-GENE-081231-1]                                                | yes |
| 030916-2]                                                            | yes |
| 030916-2]                                                            | yes |
| '28-4]                                                               | yes |
| .31-968]                                                             | yes |
| cc:ZDB-GENE-030131-2281]                                             | yes |

|                                                                                     |     |
|-------------------------------------------------------------------------------------|-----|
| .cc:ZDB-GENE-090506-7]                                                              | yes |
| bol;Acc:HGNC:30237]                                                                 | yes |
| :3034]                                                                              | yes |
|                                                                                     | yes |
|                                                                                     | yes |
|                                                                                     | yes |
|                                                                                     | yes |
| ];Acc:ZDB-GENE-130530-559]                                                          | yes |
| :ZFIN;Acc:ZDB-GENE-040426-892]                                                      | yes |
| ource:ZFIN;Acc:ZDB-GENE-121129-1]                                                   | yes |
| 3-GENE-040808-32]                                                                   | yes |
| N;Acc:ZDB-GENE-980526-137]                                                          | yes |
| ENE-080723-32]                                                                      | yes |
| DB-GENE-090313-248]                                                                 | yes |
| ENE-091118-58]                                                                      | yes |
| yclin-dependent kinase 12 [Source:ZFIN;Acc:ZDB-GENE-081104-294]                     | yes |
| 'DB-GENE-040426-821]                                                                | yes |
| 'DB-GENE-040426-821]                                                                | yes |
| l;Acc:ZDB-GENE-030616-60]                                                           | yes |
| ENE-050417-155]                                                                     | yes |
|                                                                                     | yes |
| i3]                                                                                 | yes |
| \acc:ZDB-GENE-060526-282]                                                           | yes |
| calcium/calmodulin-dependent protein kinase kinase 1, alpha a [Source:Z]            | yes |
| 3]                                                                                  | yes |
| ember 3 [Source:ZFIN;Acc:ZDB-GENE-060503-811]                                       | yes |
| 'ce:ZFIN;Acc:ZDB-GENE-041114-118]                                                   | yes |
| 'ce:ZFIN;Acc:ZDB-GENE-041114-118]                                                   | yes |
| IN;Acc:ZDB-GENE-070122-2]                                                           | yes |
|                                                                                     | yes |
| B-GENE-991207-1]                                                                    | yes |
| .198]                                                                               | yes |
| -030131-4477]                                                                       | yes |
| brain specific kinase 146 [Source:ZFIN;Acc:ZDB-GENE-060313-3]                       | yes |
| :ZFIN;Acc:ZDB-GENE-100921-43]                                                       | yes |
| 1]                                                                                  | yes |
| 2,3-bisphosphoglycerate mutase [Source:ZFIN;Acc:ZDB-GENE-040718-375]                | yes |
| 2,3-bisphosphoglycerate mutase [Source:ZFIN;Acc:ZDB-GENE-040718-375]                | yes |
| IE-091204-306]                                                                      | yes |
| Acc:HGNC:1065]                                                                      | yes |
| IE-050208-235]                                                                      | yes |
| 3-GENE-121116-7]                                                                    | yes |
| NE-060825-45]                                                                       | yes |
| ATPase sarcoplasmic/endoplasmic reticulum Ca <sup>2+</sup> transporting 2a [Source] | yes |
| ATPase phospholipid transporting 11A [Source:HGNC Symbol;Acc:HGNC:1]                | yes |
| [Source:ZFIN;Acc:ZDB-GENE-050517-16]                                                | yes |
|                                                                                     | yes |
|                                                                                     | yes |
| !6-2311]                                                                            | yes |
| !]                                                                                  | yes |
|                                                                                     | yes |
| ce:ZFIN;Acc:ZDB-GENE-000509-2]                                                      | yes |
| )41212-33]                                                                          | yes |
