# Supplementary material for: MiR-202 controls female fecundity by regulating medaka oogenesis
Source: PubMed Central journal article supplement (PMC6147661; doi:10.1371/journal.pgen.1007593), 2018-09-10
Supplement: pgen.1007593.s006.pdf [file pgen.1007593.s006.pdf]

**S3 Table. Primers used for HIDI-PCR**

| Name                   | Sequence (5'-->3')    |
|------------------------|-----------------------|
| Genot_HIDI_MiR202_F    | CAACCAGTCAATGCACATGAT |
| Genot_HIDI_MiR202WT_R  | ACCTCTGCAGCCCCATTTTC  |
| Genot_HIDI_MiR202Mut_R | AAACCTCTGCAGCCCATG    |
