# Supplementary material for: MiR-202 controls female fecundity by regulating medaka oogenesis
Source: PubMed Central journal article supplement (PMC6147661; doi:10.1371/journal.pgen.1007593), 2018-09-10
Supplement: pgen.1007593.s007.pdf [file pgen.1007593.s007.pdf]

**S4 Table. Primers used for qRT-PCR**

| Gene name       | Sequence (5' --> 3')  |
|-----------------|-----------------------|
| RPL7_F          | GAGATCCGCCTGGCTCGTA   |
| RPL7_R          | GGGCTGACTCCGTTGATACCT |
| Wnt2b_F         | GCACCAGTTCAGACACCATC  |
| Wnt2b_R         | TGCTTCTCGACTGCTTCTGA  |
| Wnt4_F          | AGTGTCATGGAGTGTCTGGG  |
| Wnt4_R          | CCTCAGTGGCACCATCAAAC  |
| Clockb_F        | CGTCAACAACCAGCAGTGAA  |
| Clockb_R        | AGTGGAGAATTGAGGCAGCT  |
| Setd4_F         | CTACCTGGGGCCGTTCTTAA  |
| Setd4_R         | CGCACACCAGAAAGACACAA  |
| Klh123_F        | ATGATGGGAAGCTGAGGTCC  |
| Klh123_R        | GGGTGCCAGTAGTATCCTCC  |
| Npr1_F          | TGAAGATGCCACGGTACTGT  |
| Npr1_R          | AGCAGACACGTGGATCTTCA  |
| Srgap3_F        | GCACACCACATTCAGCAGAT  |
| Srgap3_R        | CCATCATGTTCTCGTCGCTG  |
| Cyp19a1a_F      | CTCTTCCTGGGTGTTCTGTTG |
| Cyp19a1a_R      | GCTGCTGTCTTGTGCCTCTG  |
| Cyp17_F         | AGTGACACCAGCCTCGGAGA  |
| Cyp17_R         | GGTCCACTCCTTCTCATCGTG |
| Gsdf_F          | GGGCTGGACACTATTCGAGA  |
| Gsdf_R          | CATGACACAGAGGAGCTGGA  |
| Sox9b_F         | AGCGACTCCAAGAAGGACGA  |
| Sox9b_R         | GTCCAGTCGTAGCCCTTCAG  |
| Foxl2_F         | GTCACAAACCACAACCTGCT  |
| Foxl2_R         | TTTGGAGCCGTTTGTTCATCC |
| Foxl3_F         | CAAAGCCCACCTGAGTCATG  |
| Foxl3_R         | AGAGCCACGTACGAATAGGG  |
| Vasa_F          | CCCAAAGTGACCTACATC    |
| Vasa_R          | AAGTTGATGCCCATCTTG    |
| Inh_F           | CGTTTCCCTTCCAGCCTTC   |
| Inh_R           | AAGAGCGTTGCGGATGAG    |
| Syp3_F          | ACTTTAGTGGCGGGAAGACG  |
| Syp3_R          | GCACATTCATCCGCTCCTTC  |
| ControlGeneUp_F | ACTCTGGGTCTCATCTGCAC  |
| ControlGeneUp_R | GAGTCACAGCAGGTTTCAGGA |
